# Supplementary material for: Lactiplantibacillus plantarum enables blood urate control in mice through degradation of nucleosides in gastrointestinal tract
Source: PubMed Central journal article supplement (PMC10354915; doi:10.1186/s40168-023-01605-y), 2023-07-19
Supplement: 40168_2023_1605_MOESM1_ESM.pdf [file 40168_2023_1605_MOESM1_ESM.pdf]

## Supplementary Tables

**Table S1. Primer sequence of genes in this work.**

| Target gene | Forward (5'→3')                                 | Reverse (5'→3')                                    | Note                                                  |
|-------------|-------------------------------------------------|----------------------------------------------------|-------------------------------------------------------|
| β actin     | GTGCTATGTTGCTCTAGACTTCG                         | ATGCCACAGGATCCATACC                                | Reference                                             |
| SLC22A12    | CCGCTTCCGACAACCTCA                              | CTTCTGCGCCCAAACCTATC                               | Urate transporter in kidney                           |
| SLC2A9      | TGGACTCAATGCGATCTGG                             | AGAGAAGATAGCAGCCAGTGT                              | Urate transporter in kidney                           |
| SLC17A1     | TGACACTTGCCAACTCAACACT                          | CCAAACATTCCAATTAAGCTG                              | Urate transporter in kidney                           |
| ABCG2       | TAGGACGCTCGCAGAAGGA                             | AGAATAGCATTAGGCCAGGTTT                             | Urate transporter in kidney and intestine             |
| XOD         | TGATGGTTCGGTGCTGTTGA                            | GGGACGGTGTTAGTGCTTGT                               | Involved with urate synthesis in liver                |
| PNP         | GCCTGAAACAAATGGGG                               | ACCAAAGACACGGAGCCC                                 | Involved with urate synthesis in liver                |
| ENT1        | TATCGCCATTACCTGCAGCT                            | GACTGGTTTCTGTTGGTGGGT                              | Potential purine transporters in intestine            |
| ENT2        | TCTTACGCTCCTCAACTCC                             | AGTCCACCTTACCAACGC                                 | Potential purine transporters in intestine            |
| ENT3        | CTCTCCTTGCTCTGTAECTACCA                         | TGCTGAGGTAGCCGTTGC                                 | Potential purine transporters in intestine            |
| ENT4        | AGGTGACGCACAGCAACAGT                            | GAAGTAGGTTACCGCAATGGAC                             | Potential purine transporters in intestine            |
| CNT1        | GAGCCAGGATTCGTTGCG                              | CAAAGACATCCTTGACCAGAGC                             | Potential purine transporters in intestine            |
| CNT2        | AGCCAACCTGATTGCCTTTC                            | AGGAGCAGATGACCTGGAACT                              | Potential purine transporters in intestine            |
| CNT3        | GGTCGGGTGGCTAATGCT                              | GACCAGTAGTGGAACTCTGTTTG                            | Potential purine transporters in intestine            |
| 18S         | AGAATCCACGCCAGTACAAGA                           | TCTTCAGTCGCTCCAGGTCT                               | Reference                                             |
| ABCG2       | CTCAGTTTATCCGTGGTGTGTCT                         | CGTCCCTGCTTAGACATCCTT                              | Urate transporter in Caco-2 cells                     |
| CNT1        | AGCACATGCAGCTGTTTCG                             | GGAAATCCAGGAGGCAGG                                 | Potential purine transporters in Caco-2 cells         |
| CNT2        | ACTTTCCAGGTCATCTGCTCC                           | TTATGAAGAACTTATTCCCACC                             | Potential purine transporters in Caco-2 cells         |
| CNT3        | TGCTGGTGCTTCATTTGTCTT                           | ACATCACAGTGCTGAAGAAAACC                            | Potential purine transporters in Caco-2 cells         |
| ENT1        | CCTTGCCTGAGCGGAACT                              | GGAAGGAGTTGAGGTAGGTGAA                             | Potential purine transporters in Caco-2 cells         |
| ENT2        | AGGATGCCTTCAACTCAACAA                           | GAAGGAGTTGAGGAGGGTGAAG                             | Potential purine transporters in Caco-2 cells         |
| ENT3        | GACTCCCTCAGTGCCCTT                              | ATGTTGGTGCAGATGGCG                                 | Potential purine transporters in Caco-2 cells         |
| ENT4        | TCTTACCTCTGTGCGTCTACC                           | GAAGTAGCCGTTGCTGATGC                               | Potential purine transporters in Caco-2 cells         |
| RihA        | cagcaaatgggtgcggatccTTGGAA<br>GATATTATTTAGATTGT | ctcgagtgcggccgcaagcttTAAAAAGTT<br>G AAGGATTTGATGCT | For recombination between RihA and plasmid pET-28a    |
| RihB        | cagcaaatgggtgcggatccATGAATG<br>CAACCCGTAACGTTA  | ctcgagtgcggccgcaagcttTTATTTTTC<br>GCATGGCGTCA      | For recombination between RihB and plasmid pET-28a    |
| RihC        | cagcaaatgggtgcggatccATGGCAA<br>AACGCAAAATGATT   | ctcgagtgcggccgcaagcttCTAGTGTT<br>GTTTGAACAGCGTCCG  | For recombination between RihC and plasmid pET-28a    |
| RihA        | ATTGGCCGTAACCACTCAG                             | CGACCGAATGAGATGCCGTA                               | Nucleosides-degradation enzyme in <i>L. plantarum</i> |
| RihB        | CTACAGCGTGACCCACAACCT                           | GCCCCGAATACAGTCGTCAA                               | Nucleosides-degradation enzyme in <i>L. plantarum</i> |
| RihC        | TCGAACTACCCGCACCAAAA                            | GTAGTCTTACCCTGGCTT                                 | Nucleosides-degradation enzyme in <i>L. plantarum</i> |

**Table S2. Fifteen differential genera in mice supplemented *L. plantarum* when compared with HNS mice.**

|                               | Freq1(HNS) | Freq2(HNS+LP) | p-Value       | q-Value | Difference between means | 95% lower CI | 95% upper CI |
|-------------------------------|------------|---------------|---------------|---------|--------------------------|--------------|--------------|
| <b>g__Coriobacteriaceae</b>   | 0.3018     | 0.1994        | <b>0.0004</b> | 0.0295  | 0.1024                   | 0.0506       | 0.1541       |
| <b>g__Clostridium_XIVa</b>    | 5.0404     | 2.5219        | <b>0.0015</b> | 0.0595  | 2.5185                   | 1.0814       | 3.9556       |
| <b>g__Bacteroides</b>         | 5.0755     | 8.3594        | <b>0.0048</b> | 0.1228  | (3.2838)                 | (5.4616)     | (1.1060)     |
| <b>g__Roseburia</b>           | 1.0102     | 0.3177        | <b>0.0093</b> | 0.1786  | 0.6925                   | 0.1927       | 1.1923       |
| <b>g__Enterorhabdus</b>       | 0.0609     | 0.0379        | <b>0.0171</b> | 0.2637  | 0.0229                   | 0.0044       | 0.0415       |
| <b>g__Alphaproteobacteria</b> | 0.0032     | 0.0002        | <b>0.0191</b> | 0.2446  | 0.0030                   | 0.0006       | 0.0054       |
| <b>g__Lachnospiraceae</b>     | 27.0497    | 30.5853       | <b>0.0259</b> | 0.2853  | (3.5356)                 | (6.6206)     | (0.4507)     |
| <b>g__Parvibacter</b>         | 0.0417     | 0.0151        | <b>0.0323</b> | 0.3113  | 0.0266                   | 0.0025       | 0.0506       |
| <b>g__Oscillibacter</b>       | 1.7768     | 2.4179        | <b>0.0340</b> | 0.2910  | (0.6411)                 | (1.2307)     | (0.0515)     |
| <b>g__Mucispirillum</b>       | 0.0313     | 0.0580        | <b>0.0359</b> | 0.2766  | (0.0267)                 | (0.0515)     | (0.0019)     |
| <b>g__Holdemania</b>          | 0.0013     | 0.0044        | <b>0.0360</b> | 0.2518  | (0.0032)                 | (0.0062)     | (0.0002)     |
| <b>g__Bacteroidetes</b>       | 0.0225     | 0.0991        | <b>0.0415</b> | 0.2664  | (0.0766)                 | (0.1499)     | (0.0033)     |
| <b>g__Flavonifractor</b>      | 0.5902     | 0.9367        | <b>0.0447</b> | 0.2647  | (0.3465)                 | (0.6843)     | (0.0087)     |
| <b>g__Staphylococcus</b>      | 0.0001     | 0.0011        | <b>0.0455</b> | 0.2504  | (0.0010)                 | (0.0019)     | (0.0000)     |
| <b>g__Rhodospirillaceae</b>   | 0.0259     | 0.0151        | <b>0.0488</b> | 0.2506  | 0.0108                   | 0.0001       | 0.0216       |

**Table S3. Taxonomy of six microbes using NCBI Nucleotide BLAST analysis tool.**

[https://blast.ncbi.nlm.nih.gov/Blast.cgi?PROGRAM=blastn&PAGE\\_TYPE=BlastSearch&LINK\\_LOC=blasthome](https://blast.ncbi.nlm.nih.gov/Blast.cgi?PROGRAM=blastn&PAGE_TYPE=BlastSearch&LINK_LOC=blasthome)

| OUT    | BLAST from NCBI                    |
|--------|------------------------------------|
| OTU26  | <i>Lactobacillus johnsonii</i>     |
| OTU31  | <i>Limosilactobacillus reuteri</i> |
| OTU28  | <i>Ligilactobacillus murinus</i>   |
| OTU130 | <i>Lactobacillus intestinalis</i>  |
| OTU38  | Uncultured bacterium               |
| OTU356 | Uncultured bacterium               |

**Table S4. Three genes involved with nucleoside degradation in *L. plantarum*.**

| Sequence ID              | COG                                                                                                                   | KEGG                                                                              | Predictor description                        | Name        |
|--------------------------|-----------------------------------------------------------------------------------------------------------------------|-----------------------------------------------------------------------------------|----------------------------------------------|-------------|
| <b>PROKKA_0005<br/>1</b> | 6e-110 gn CDD 224868 COG1957, URH1, Inosine-uridine nucleoside N-ribohydrolase [Nucleotide transport and metabolism]. | K01239-ko00230, Purine metabolism;ko00760, Nicotinate and nicotinamide metabolism | Pyrimidine-specific ribonucleoside hydrolase | <b>RihA</b> |
| <b>PROKKA_0133<br/>7</b> | 2e-96 gn CDD 224868 COG1957, URH1, Inosine-uridine nucleoside N-ribohydrolase [Nucleotide transport and metabolism].  | K01239-ko00230, Purine metabolism;ko00760, Nicotinate and nicotinamide metabolism | Pyrimidine-specific ribonucleoside hydrolase | <b>RihB</b> |
| <b>PROKKA_0051<br/>1</b> | 8e-105 gn CDD 224868 COG1957, URH1, Inosine-uridine nucleoside N-ribohydrolase [Nucleotide transport and metabolism]. | K01239-ko00230, Purine metabolism;ko00760, Nicotinate and nicotinamide metabolism | Non-specific ribonucleoside hydrolase        | <b>RihC</b> |

**Table S5. Annotated genes contributed to the nucleotide and nucleoside metabolism, which showed that no enzyme in *L. plantarum* enable to catalyze the transformation of guanine and hypoxanthine into xanthine and resultant urate.**

Inosine-uridine nucleoside N-ribohydrolase; Aspartate carbamoyltransferase, catalytic chain; ADP-ribose pyrophosphatase; GMP synthase - Glutamine amidotransferase domain; Thymidylate kinase; Purine-cytosine permease and related proteins; ADP-ribose pyrophosphatase; Nucleoside 2-deoxyribosyltransferase; Nucleoside diphosphate kinase; Inosine-uridine nucleoside N-ribohydrolase; Phosphoribosylaminoimidazole carboxylase (NCAIR synthetase); Adenine/guanine phosphoribosyltransferases and related PRPP-binding proteins; CTP synthase (UTP-ammonia lyase); Deoxyribose-phosphate aldolase; Carbamoylphosphate synthase large subunit (split gene in MJ); Carbamoylphosphate synthase small subunit; Hypoxanthine-guanine phosphoribosyltransferase; Inosine-uridine nucleoside N-ribohydrolase; Deoxycytidylate deaminase; Adenine/guanine phosphoribosyltransferases and related PRPP-binding proteins; ADP-ribose pyrophosphatase; Nucleoside phosphorylase; Dihydroorotate dehydrogenase; Carbamoylphosphate synthase large subunit (split gene in MJ); Carbamoylphosphate synthase small subunit; Dihydroorotase and related cyclic amidohydrolases; Aspartate carbamoyltransferase, catalytic chain; Pyrimidine operon attenuation protein/uracil phosphoribosyltransferase; Xanthine/uracil permeases; Phosphoribosylamine-glycine ligase; AICAR transformylase/IMP cyclohydrolase PurH (only IMP cyclohydrolase domain in Aful); Folate-dependent phosphoribosylglycinamide formyltransferase PurN; Phosphoribosylaminoimidazole (AIR) synthetase; Glutamine phosphoribosylpyrophosphate amidotransferase; Phosphoribosylformylglycinamide (FGAM) synthase, synthetase domain; Phosphoribosylformylglycinamide (FGAM) synthase, glutamine amidotransferase domain; Phosphoribosylformylglycinamide (FGAM) synthase, PurS component; Phosphoribosylaminoimidazolesuccinocarboxamide (SAICAR) synthase; Phosphoribosylcarboxyaminoimidazole (NCAIR) mutase; dUTPase; 5'-nucleotidase/2',3'-cyclic phosphodiesterase and related esterases; Xanthosine triphosphate pyrophosphatase; Inosine-uridine nucleoside N-ribohydrolase; Phosphoribosylaminoimidazole carboxylase (NCAIR synthetase); Adenine/guanine phosphoribosyltransferases and related PRPP-binding proteins; Adenylate kinase and related kinases; Deoxynucleoside kinases; Uridine kinase; GMP synthase, PP-ATPase domain/subunit; ADP-ribose pyrophosphatase; Guanylate kinase; ADP-ribose pyrophosphatase; Thymidylate kinase; Ribonucleotide reductase, beta subunit; Ribonucleotide reductase, alpha subunit; Protein involved in ribonucleotide reduction; Oxygen-sensitive ribonucleoside-triphosphate reductase; IMP dehydrogenase/GMP reductase; Nucleoside permease; Adenylosuccinate lyase; Adenylosuccinate synthase; IMP dehydrogenase/GMP reductase; Xanthosine triphosphate pyrophosphatase; ADP-ribose pyrophosphatase; Uridine kinase; Guanylate kinase; Pyrimidine operon attenuation protein/uracil phosphoribosyltransferase; Carbamoylphosphate synthase small subunit; Carbamoylphosphate synthase large subunit (split gene in MJ); Thymidylate synthase; Cytidylate kinase; ADP-ribose pyrophosphatase; Thymidine kinase; Uracil phosphoribosyltransferase; Xanthine/uracil permeases; Uridine phosphorylase; 5'-nucleotidase/2',3'-cyclic phosphodiesterase and related esterases; Nucleoside 2-deoxyribosyltransferase; Purine-cytosine permease and related proteins; Adenine deaminase; Deoxynucleoside kinases; Adenine/guanine phosphoribosyltransferases and related PRPP-binding proteins; Formyltetrahydrofolate synthetase

**Table S6. Genes involved with purine permeation in *L. plantarum*.**

| Gene ID      | Predictor description              | Function in <i>Lactobacillus</i>                                                                                                                  |
|--------------|------------------------------------|---------------------------------------------------------------------------------------------------------------------------------------------------|
| PROKKA_01052 | Uric acid permease Puck            | <a href="https://www.orthodb.org/?level=&amp;species=&amp;query=5237at1578">https://www.orthodb.org/?level=&amp;species=&amp;query=5237at1578</a> |
| PROKKA_01053 | Guanine/hypoxanthine permease PbuG | <a href="https://www.orthodb.org/?level=&amp;species=&amp;query=5582at1578">https://www.orthodb.org/?level=&amp;species=&amp;query=5582at1578</a> |
| PROKKA_01673 | Guanine/hypoxanthine permease PbuG | <a href="https://www.orthodb.org/?level=&amp;species=&amp;query=5582at1578">https://www.orthodb.org/?level=&amp;species=&amp;query=5582at1578</a> |

**Table S7. Permeation for nucleobases in *L. plantarum* within 2 hours.**

| Content in cell % | 0h  |     |     | 1h  |     |     | 2h  |     |     | p-Value 0h vs 1h | p-Value 1h vs 2h | p-Value 0h vs 2h |
|-------------------|-----|-----|-----|-----|-----|-----|-----|-----|-----|------------------|------------------|------------------|
|                   | 1   | 2   | 3   | 1   | 2   | 3   | 1   | 2   | 3   |                  |                  |                  |
| Hypoxanthine      | 0.2 | 0.7 | 0.5 | 1.7 | 1.8 | 1.6 | 3.5 | 3.4 | 3.7 | 0.00952          | 0.00581          | 0.00332          |
| Guanine           | 0.2 | 0.3 | 0.3 | 1.1 | 0.9 | 1.1 | 3.1 | 2.8 | 3.1 | 0.01065          | 0.00020          | 0.00153          |

**Table S8. Solubility of nucleosides and nucleobases in water**

| Substance    | ChemSpider ID | Water Solubility Estimate from Log Kow (WSKOW v1.41) mg/L, 25 °C | Water Sol Estimate from Fragments (v1.01 est) mg/L | Water Solubility in Chemical Book g/L |
|--------------|---------------|------------------------------------------------------------------|----------------------------------------------------|---------------------------------------|
| Inosine      | 21241953      | 1.00E+06                                                         | 1.00E+06                                           | 21                                    |
| Guanosine    | 6544          | 1.00E+06                                                         | 1.00E+06                                           | 0.75                                  |
| Hypoxanthine | 11205977      | 1.26E+04                                                         | 1874.9                                             | Practically insoluble                 |
| Guanine      | 744           | 1.00E+06                                                         | 1.00E+06                                           | Practically insoluble                 |



**Table S9. Nodes information in multi-omic network analysis given by Fig. 2A.**

| Group      | Node     | Weight degree | Eigenvector centrality | Betweenness centrality | Closeness centrality | Degree |
|------------|----------|---------------|------------------------|------------------------|----------------------|--------|
| gene       | GLUT9    | 7.3287        | 6.16E-04               | 174                    | 2.47E-04             | 6      |
| gene       | NPT1     | 5.8494        | 2.15E-01               | 228                    | 4.61E-04             | 9      |
| gene       | XOD      | 1.4052        | 1.02E-02               | 0                      | 4.50E-04             | 2      |
| gene       | PNP      | 4.3481        | 1.02E-01               | 189                    | 4.60E-04             | 7      |
| gene       | URAT1    | 7.2403        | 1.72E-01               | 80                     | 4.60E-04             | 11     |
| gene       | ABCG2    | 2.9662        | 3.91E-02               | 0                      | 4.52E-04             | 4      |
| metabolite | Serum UA | 3.6442        | 3.04E-02               | 24                     | 4.53E-04             | 5      |
| microbiota | OTU7     | 3.1364        | 8.88E-02               | 31                     | 4.59E-04             | 5      |
| microbiota | OTU73    | 0.6403        | 2.17E-04               | 0                      | 4.36E-04             | 1      |
| microbiota | OTU82    | 0.4159        | 2.06E-04               | 0                      | 4.76E-04             | 1      |
| microbiota | OTU1     | 0.3479        | 2.46E-02               | 0                      | 4.21E-04             | 1      |
| microbiota | OTU2     | 7.7468        | 6.40E-01               | 76.5                   | 4.64E-04             | 12     |
| microbiota | OTU1     | 12.8182       | 5.01E-01               | 196                    | 4.65E-04             | 20     |
| microbiota | OTU6     | 9.5013        | 2.91E-01               | 178.5                  | 4.63E-04             | 15     |
| microbiota | OTU14    | 4.7805        | 9.03E-02               | 55                     | 4.59E-04             | 8      |
| microbiota | OTU13    | 9.2961        | 6.11E-01               | 358                    | 4.65E-04             | 15     |
| microbiota | OTU24    | 6.7636        | 1.35E-01               | 63                     | 4.59E-04             | 10     |
| microbiota | OTU63    | 7.5299        | 1.24E-01               | 226                    | 4.60E-04             | 12     |
| microbiota | OTU378   | 6.8948        | 1.51E-01               | 60                     | 4.60E-04             | 11     |
| microbiota | OTU33    | 6.3286        | 1.27E-01               | 77                     | 4.60E-04             | 10     |
| microbiota | OTU67    | 4.1727        | 2.19E-01               | 63                     | 4.61E-04             | 7      |
| microbiota | OTU321   | 7.2675        | 1.64E-01               | 24                     | 4.60E-04             | 11     |
| microbiota | OTU36    | 6.9610        | 1.60E-01               | 67                     | 4.60E-04             | 11     |
| microbiota | OTU70    | 11.1429       | 8.84E-01               | 60                     | 4.63E-04             | 17     |
| microbiota | OTU39    | 9.7883        | 2.16E-01               | 578                    | 4.64E-04             | 16     |
| microbiota | OTU40    | 10.7870       | 9.00E-01               | 15                     | 4.63E-04             | 16     |
| microbiota | OTU71    | 6.0532        | 4.01E-01               | 92                     | 4.63E-04             | 10     |
| microbiota | OTU55    | 9.2195        | 6.44E-01               | 169.5                  | 4.65E-04             | 15     |
| microbiota | OTU52    | 4.4468        | 2.81E-01               | 8                      | 4.60E-04             | 7      |
| microbiota | OTU65    | 4.2740        | 2.25E-01               | 95.5                   | 4.61E-04             | 7      |
| microbiota | OTU15    | 9.7870        | 7.31E-01               | 92                     | 4.62E-04             | 15     |
| microbiota | OTU10    | 9.9519        | 8.17E-01               | 160                    | 4.62E-04             | 15     |
| microbiota | OTU59    | 9.9416        | 6.68E-01               | 282                    | 4.63E-04             | 16     |
| microbiota | OTU42    | 10.0078       | 7.52E-01               | 76                     | 4.63E-04             | 16     |
| microbiota | OTU142   | 13.2494       | 9.18E-01               | 290.5                  | 4.65E-04             | 21     |
| microbiota | OTU44    | 9.4221        | 6.22E-01               | 288                    | 4.63E-04             | 15     |
| microbiota | OTU60    | 13.3403       | 1.00E+00               | 159.25                 | 4.64E-04             | 21     |
| microbiota | OTU107   | 1.9286        | 8.76E-02               | 0                      | 4.58E-04             | 3      |
| microbiota | OTU57    | 2.5584        | 6.06E-02               | 0                      | 4.55E-04             | 4      |
| microbiota | OTU49    | 3.0545        | 6.73E-02               | 61                     | 4.58E-04             | 5      |
| microbiota | OTU34    | 1.2688        | 1.42E-02               | 0                      | 4.52E-04             | 2      |
| microbiota | OTU111   | 5.6130        | 7.91E-02               | 107                    | 4.60E-04             | 9      |
| microbiota | OTU16    | 8.0208        | 4.81E-01               | 279                    | 4.64E-04             | 13     |
| microbiota | OTU83    | 5.6078        | 3.58E-01               | 50                     | 4.62E-04             | 9      |
| microbiota | OTU104   | 9.3766        | 7.53E-01               | 68                     | 4.62E-04             | 15     |
| microbiota | OTU62    | 3.3299        | 3.03E-02               | 22                     | 4.54E-04             | 5      |
| microbiota | OTU47    | 1.8455        | 1.27E-02               | 4                      | 4.50E-04             | 3      |

|            |        |         |          |       |          |    |
|------------|--------|---------|----------|-------|----------|----|
| microbiota | OTU66  | 1.2935  | 1.35E-02 | 0     | 4.50E-04 | 2  |
| microbiota | OTU106 | 2.4481  | 3.83E-02 | 79    | 4.55E-04 | 4  |
| microbiota | OTU356 | 2.4403  | 1.58E-02 | 235   | 4.55E-04 | 4  |
| microbiota | OTU8   | 13.8065 | 9.71E-01 | 198.5 | 4.64E-04 | 21 |
| microbiota | OTU25  | 3.6974  | 2.28E-01 | 55    | 4.59E-04 | 6  |
| microbiota | OTU56  | 10.8221 | 8.37E-01 | 77.75 | 4.63E-04 | 16 |
| microbiota | OTU292 | 4.4312  | 3.16E-01 | 118   | 4.60E-04 | 7  |
| microbiota | OTU32  | 2.9532  | 2.43E-01 | 4     | 4.58E-04 | 5  |
| microbiota | OTU76  | 2.5104  | 2.32E-01 | 0     | 4.56E-04 | 4  |
| microbiota | OTU295 | 3.5078  | 1.75E-01 | 25    | 4.56E-04 | 5  |
| microbiota | OTU336 | 5.5325  | 3.38E-01 | 170   | 4.60E-04 | 9  |
| microbiota | OTU51  | 4.1870  | 1.88E-01 | 99    | 4.60E-04 | 7  |
| microbiota | OTU53  | 1.7299  | 3.60E-02 | 87    | 4.52E-04 | 3  |
| microbiota | OTU93  | 3.6896  | 3.35E-01 | 2     | 4.58E-04 | 6  |
| microbiota | OTU109 | 3.6532  | 2.79E-01 | 6     | 4.58E-04 | 6  |
| microbiota | OTU64  | 4.8364  | 2.44E-01 | 206   | 4.60E-04 | 8  |
| microbiota | OTU61  | 3.6091  | 2.49E-01 | 11    | 4.59E-04 | 6  |
| microbiota | OTU37  | 1.1325  | 4.66E-02 | 0     | 4.58E-04 | 2  |
| microbiota | OTU127 | 1.2701  | 4.08E-02 | 0     | 4.55E-04 | 2  |
| microbiota | OTU43  | 3.8649  | 7.41E-02 | 199   | 4.55E-04 | 6  |
| microbiota | OTU45  | 5.6273  | 2.37E-01 | 58    | 4.60E-04 | 9  |
| microbiota | OTU141 | 0.6455  | 4.77E-02 | 0     | 4.51E-04 | 1  |
| microbiota | OTU5   | 9.0636  | 6.55E-01 | 83    | 4.61E-04 | 14 |
| microbiota | OTU19  | 5.0299  | 9.54E-02 | 44    | 4.59E-04 | 8  |
| microbiota | OTU9   | 2.5000  | 3.55E-02 | 11    | 4.55E-04 | 4  |
| microbiota | OTU21  | 1.7688  | 1.15E-02 | 21    | 4.50E-04 | 3  |
| microbiota | OTU4   | 1.2429  | 1.86E-02 | 0     | 4.47E-04 | 2  |
| microbiota | OTU48  | 1.2896  | 7.67E-03 | 12    | 4.47E-04 | 2  |
| microbiota | OTU58  | 0.5935  | 5.11E-03 | 0     | 4.45E-04 | 1  |
| microbiota | OTU20  | 1.9481  | 7.72E-02 | 2     | 4.55E-04 | 3  |
| microbiota | OTU221 | 1.9000  | 7.28E-02 | 0     | 4.55E-04 | 3  |
| microbiota | OTU17  | 3.5429  | 1.01E-01 | 55    | 4.58E-04 | 6  |
| microbiota | OTU30  | 2.5857  | 1.33E-01 | 228   | 4.58E-04 | 4  |
| microbiota | OTU46  | 1.2961  | 9.22E-03 | 86    | 4.47E-04 | 2  |
| microbiota | OTU22  | 1.1701  | 1.61E-02 | 86    | 4.50E-04 | 2  |
| microbiota | OTU29  | 0.5870  | 5.89E-04 | 0     | 4.40E-04 | 1  |
| microbiota | OTU11  | 0.5545  | 1.93E-03 | 0     | 4.42E-04 | 1  |
| microbiota | OTU38  | 0.6701  | 0.00E+00 | 0     | 4.32E-04 | 1  |
| microbiota | OTU31  | 2.0390  | 1.01E-03 | 93    | 4.43E-04 | 3  |
| microbiota | OTU26  | 3.2571  | 2.34E-02 | 115   | 4.54E-04 | 5  |
| microbiota | OTU130 | 1.2506  | 6.45E-04 | 60    | 4.45E-04 | 2  |
| microbiota | OTU35  | 0.5494  | 4.05E-02 | 0     | 4.53E-04 | 1  |
| microbiota | OTU41  | 1.7156  | 2.49E-02 | 59    | 4.53E-04 | 3  |
| microbiota | OTU28  | 0.5857  | 7.59E-04 | 0     | 4.45E-04 | 1  |

**Table S10. Edges information in multi-omic network analysis given by Fig. 2A.**

| Node 1   | Node 2 | Correlation | Relationship | Weight |
|----------|--------|-------------|--------------|--------|
| Serum UA | ABCG2  | -0.8247     | negative     | 0.82   |
| OTU26    | ABCG2  | -0.7636     | negative     | 0.76   |
| OTU73    | GLUT9  | -0.8252     | negative     | 0.83   |
| OTU82    | GLUT9  | -0.7832     | negative     | 0.78   |
| URAT1    | GLUT9  | -0.7124     | negative     | 0.71   |
| NPT1     | GLUT9  | 0.7152      | positive     | 0.72   |
| OTU7     | GLUT9  | 0.7203      | positive     | 0.72   |
| Serum UA | GLUT9  | 0.8958      | positive     | 0.90   |
| OTU56    | NPT1   | -0.7506     | negative     | 0.75   |
| Serum UA | NPT1   | -0.7130     | negative     | 0.71   |
| OTU26    | NPT1   | -0.7253     | negative     | 0.73   |
| OTU10    | NPT1   | -0.7058     | negative     | 0.71   |
| OTU49    | NPT1   | 0.7417      | positive     | 0.74   |
| OTU1     | NPT1   | 0.7494      | positive     | 0.75   |
| OTU71    | NPT1   | 0.7039      | positive     | 0.70   |
| ABCG2    | NPT1   | 0.8208      | positive     | 0.82   |
| OTU15    | OTU10  | -0.7870     | negative     | 0.79   |
| OTU5     | OTU10  | -0.7766     | negative     | 0.78   |
| OTU2     | OTU10  | -0.7097     | negative     | 0.71   |
| OTU8     | OTU10  | 0.7208      | positive     | 0.72   |
| OTU56    | OTU104 | -0.7987     | negative     | 0.80   |
| OTU10    | OTU104 | -0.7688     | negative     | 0.77   |
| OTU8     | OTU104 | -0.7519     | negative     | 0.75   |
| OTU142   | OTU104 | -0.7487     | negative     | 0.75   |
| OTU13    | OTU104 | -0.7123     | negative     | 0.71   |
| OTU61    | OTU104 | 0.7006      | positive     | 0.70   |
| OTU70    | OTU104 | 0.7084      | positive     | 0.71   |
| OTU32    | OTU104 | 0.7136      | positive     | 0.71   |
| OTU15    | OTU104 | 0.7240      | positive     | 0.72   |
| OTU83    | OTU104 | 0.7326      | positive     | 0.73   |
| OTU45    | OTU104 | 0.7443      | positive     | 0.74   |
| OTU40    | OTU104 | 0.7286      | positive     | 0.73   |
| OTU44    | OTU104 | 0.7119      | positive     | 0.71   |
| OTU5     | OTU104 | 0.7104      | positive     | 0.71   |
| OTU66    | OTU106 | 0.7019      | positive     | 0.70   |
| OTU41    | OTU106 | 0.7118      | positive     | 0.71   |
| OTU63    | OTU106 | 0.7325      | positive     | 0.73   |
| OTU336   | OTU106 | 0.7218      | positive     | 0.72   |
| OTU13    | OTU107 | -0.7727     | negative     | 0.77   |
| OTU6     | OTU107 | 0.7314      | positive     | 0.73   |
| OTU10    | OTU109 | -0.7448     | negative     | 0.74   |
| OTU93    | OTU109 | 0.7266      | positive     | 0.73   |
| OTU5     | OTU109 | 0.7300      | positive     | 0.73   |
| OTU336   | OTU109 | 0.7286      | positive     | 0.73   |
| OTU15    | OTU109 | 0.7494      | positive     | 0.75   |
| OTU51    | OTU111 | 0.7019      | positive     | 0.70   |
| OTU14    | OTU111 | 0.7110      | positive     | 0.71   |

|        |        |         |          |      |
|--------|--------|---------|----------|------|
| OTU62  | OTU111 | 0.7222  | positive | 0.72 |
| OTU36  | OTU111 | 0.7352  | positive | 0.74 |
| OTU39  | OTU111 | 0.7352  | positive | 0.74 |
| OTU127 | OTU111 | 0.7236  | positive | 0.72 |
| OTU24  | OTU111 | 0.7296  | positive | 0.73 |
| OTU33  | OTU111 | 0.7260  | positive | 0.73 |
| OTU16  | OTU127 | 0.7365  | positive | 0.74 |
| OTU6   | OTU13  | -0.7156 | negative | 0.72 |
| OTU1   | OTU13  | -0.7214 | negative | 0.72 |
| OTU30  | OTU13  | 0.7469  | positive | 0.75 |
| OTU8   | OTU13  | 0.7140  | positive | 0.71 |
| OTU31  | OTU130 | 0.7157  | positive | 0.72 |
| OTU356 | OTU130 | 0.7249  | positive | 0.72 |
| OTU1   | OTU14  | 0.7019  | positive | 0.70 |
| OTU19  | OTU14  | 0.7339  | positive | 0.73 |
| OTU44  | OTU141 | 0.7455  | positive | 0.75 |
| OTU292 | OTU142 | -0.7312 | negative | 0.73 |
| OTU59  | OTU142 | -0.7338 | negative | 0.73 |
| OTU16  | OTU142 | -0.7065 | negative | 0.71 |
| OTU2   | OTU142 | -0.7039 | negative | 0.70 |
| OTU25  | OTU142 | -0.7396 | negative | 0.74 |
| OTU42  | OTU142 | -0.7279 | negative | 0.73 |
| OTU64  | OTU142 | -0.7123 | negative | 0.71 |
| OTU56  | OTU142 | 0.7110  | positive | 0.71 |
| OTU10  | OTU142 | 0.7352  | positive | 0.74 |
| OTU13  | OTU142 | 0.7078  | positive | 0.71 |
| OTU30  | OTU142 | 0.7610  | positive | 0.76 |
| OTU8   | OTU142 | 0.8143  | positive | 0.81 |
| OTU2   | OTU15  | 0.7171  | positive | 0.72 |
| OTU13  | OTU16  | -0.7104 | negative | 0.71 |
| OTU8   | OTU16  | -0.7234 | negative | 0.72 |
| OTU292 | OTU16  | 0.7175  | positive | 0.72 |
| OTU7   | OTU16  | 0.7094  | positive | 0.71 |
| OTU221 | OTU17  | 0.7430  | positive | 0.74 |
| OTU1   | OTU2   | 0.7296  | positive | 0.73 |
| OTU5   | OTU20  | 0.7106  | positive | 0.71 |
| OTU9   | OTU21  | -0.7143 | negative | 0.71 |
| OTU6   | OTU24  | 0.7313  | positive | 0.73 |
| OTU1   | OTU24  | 0.7335  | positive | 0.73 |
| OTU8   | OTU25  | -0.7519 | negative | 0.75 |
| OTU31  | OTU26  | 0.7831  | positive | 0.78 |
| OTU22  | OTU29  | -0.7370 | negative | 0.74 |
| OTU8   | OTU292 | -0.7156 | negative | 0.72 |
| OTU142 | OTU295 | -0.7740 | negative | 0.77 |
| OTU8   | OTU295 | -0.7110 | negative | 0.71 |
| OTU4   | OTU295 | 0.7283  | positive | 0.73 |
| OTU292 | OTU295 | 0.7636  | positive | 0.76 |
| OTU43  | OTU295 | 0.8208  | positive | 0.82 |
| OTU38  | OTU31  | 0.7301  | positive | 0.73 |
| OTU8   | OTU32  | -0.7084 | negative | 0.71 |

|        |        |         |          |      |
|--------|--------|---------|----------|------|
| OTU59  | OTU32  | 0.7149  | positive | 0.71 |
| OTU24  | OTU321 | -0.7026 | negative | 0.70 |
| OTU1   | OTU321 | -0.7870 | negative | 0.79 |
| OTU33  | OTU321 | -0.7753 | negative | 0.78 |
| OTU14  | OTU321 | -0.7104 | negative | 0.71 |
| OTU19  | OTU321 | -0.7026 | negative | 0.70 |
| OTU6   | OTU321 | -0.7318 | negative | 0.73 |
| OTU63  | OTU321 | 0.7032  | positive | 0.70 |
| OTU378 | OTU321 | 0.7403  | positive | 0.74 |
| OTU63  | OTU33  | -0.7253 | negative | 0.73 |
| OTU378 | OTU33  | -0.7214 | negative | 0.72 |
| OTU7   | OTU33  | 0.7019  | positive | 0.70 |
| OTU14  | OTU33  | 0.7071  | positive | 0.71 |
| OTU1   | OTU33  | 0.7105  | positive | 0.71 |
| OTU24  | OTU33  | 0.7117  | positive | 0.71 |
| OTU10  | OTU336 | -0.7039 | negative | 0.70 |
| OTU8   | OTU336 | -0.7097 | negative | 0.71 |
| OTU142 | OTU336 | -0.7032 | negative | 0.70 |
| OTU15  | OTU336 | 0.7006  | positive | 0.70 |
| OTU41  | OTU336 | 0.7227  | positive | 0.72 |
| OTU25  | OTU336 | 0.7442  | positive | 0.74 |
| OTU42  | OTU336 | 0.7377  | positive | 0.74 |
| OTU14  | OTU34  | -0.7481 | negative | 0.75 |
| OTU39  | OTU356 | 0.7149  | positive | 0.71 |
| OTU28  | OTU356 | 0.7157  | positive | 0.72 |
| OTU62  | OTU356 | 0.7547  | positive | 0.75 |
| OTU321 | OTU36  | -0.7545 | negative | 0.75 |
| OTU6   | OTU36  | 0.7045  | positive | 0.70 |
| OTU51  | OTU36  | 0.7240  | positive | 0.72 |
| OTU14  | OTU36  | 0.7365  | positive | 0.74 |
| OTU20  | OTU36  | 0.7378  | positive | 0.74 |
| OTU1   | OTU36  | 0.7312  | positive | 0.73 |
| OTU24  | OTU36  | 0.7338  | positive | 0.73 |
| OTU33  | OTU36  | 0.8169  | positive | 0.82 |
| OTU16  | OTU37  | 0.7006  | positive | 0.70 |
| OTU1   | OTU378 | -0.7844 | negative | 0.78 |
| OTU19  | OTU378 | -0.7273 | negative | 0.73 |
| OTU9   | OTU378 | -0.7474 | negative | 0.75 |
| OTU6   | OTU378 | -0.7162 | negative | 0.72 |
| OTU63  | OTU378 | 0.7275  | positive | 0.73 |
| OTU378 | OTU39  | -0.7182 | negative | 0.72 |
| OTU63  | OTU39  | -0.7409 | negative | 0.74 |
| OTU13  | OTU39  | -0.7110 | negative | 0.71 |
| OTU33  | OTU39  | 0.7123  | positive | 0.71 |
| OTU16  | OTU39  | 0.7279  | positive | 0.73 |
| OTU37  | OTU39  | 0.7118  | positive | 0.71 |
| OTU107 | OTU39  | 0.7144  | positive | 0.71 |
| OTU36  | OTU39  | 0.7430  | positive | 0.74 |
| OTU1   | OTU39  | 0.7495  | positive | 0.75 |
| OTU9   | OTU39  | 0.7442  | positive | 0.74 |

|        |       |         |          |      |
|--------|-------|---------|----------|------|
| OTU6   | OTU39 | 0.7922  | positive | 0.79 |
| OTU10  | OTU40 | -0.7468 | negative | 0.75 |
| OTU56  | OTU40 | -0.7234 | negative | 0.72 |
| OTU8   | OTU40 | -0.7416 | negative | 0.74 |
| OTU142 | OTU40 | -0.7435 | negative | 0.74 |
| OTU32  | OTU40 | 0.7521  | positive | 0.75 |
| OTU1   | OTU40 | 0.7106  | positive | 0.71 |
| OTU44  | OTU40 | 0.7314  | positive | 0.73 |
| OTU42  | OTU40 | 0.7169  | positive | 0.72 |
| OTU2   | OTU40 | 0.7338  | positive | 0.73 |
| OTU5   | OTU40 | 0.7455  | positive | 0.75 |
| OTU15  | OTU40 | 0.7610  | positive | 0.76 |
| OTU70  | OTU40 | 0.7766  | positive | 0.78 |
| OTU8   | OTU42 | -0.7052 | negative | 0.71 |
| OTU13  | OTU42 | -0.7006 | negative | 0.70 |
| OTU5   | OTU42 | 0.7274  | positive | 0.73 |
| OTU15  | OTU42 | 0.7456  | positive | 0.75 |
| OTU2   | OTU42 | 0.7416  | positive | 0.74 |
| OTU59  | OTU42 | 0.7210  | positive | 0.72 |
| OTU16  | OTU42 | 0.7065  | positive | 0.71 |
| OTU30  | OTU43 | -0.7019 | negative | 0.70 |
| OTU4   | OTU43 | 0.7045  | positive | 0.70 |
| OTU59  | OTU43 | 0.7456  | positive | 0.75 |
| OTU56  | OTU44 | -0.7091 | negative | 0.71 |
| OTU142 | OTU44 | -0.7273 | negative | 0.73 |
| OTU17  | OTU44 | -0.7006 | negative | 0.70 |
| OTU8   | OTU44 | -0.7006 | negative | 0.70 |
| OTU35  | OTU44 | -0.6994 | negative | 0.70 |
| OTU5   | OTU44 | 0.7170  | positive | 0.72 |
| OTU59  | OTU44 | 0.7261  | positive | 0.73 |
| OTU15  | OTU44 | 0.7106  | positive | 0.71 |
| OTU2   | OTU44 | 0.7156  | positive | 0.72 |
| OTU17  | OTU45 | -0.7279 | negative | 0.73 |
| OTU64  | OTU45 | 0.7279  | positive | 0.73 |
| OTU5   | OTU45 | 0.7404  | positive | 0.74 |
| OTU19  | OTU45 | 0.7299  | positive | 0.73 |
| OTU7   | OTU45 | 0.7390  | positive | 0.74 |
| OTU32  | OTU45 | 0.7442  | positive | 0.74 |
| OTU59  | OTU45 | 0.7468  | positive | 0.75 |
| OTU73  | OTU46 | 0.7403  | positive | 0.74 |
| OTU30  | OTU46 | 0.7158  | positive | 0.72 |
| OTU21  | OTU47 | -0.7123 | negative | 0.71 |
| OTU62  | OTU47 | 0.7312  | positive | 0.73 |
| OTU24  | OTU47 | 0.7119  | positive | 0.71 |
| OTU41  | OTU48 | 0.7110  | positive | 0.71 |
| OTU43  | OTU48 | 0.7286  | positive | 0.73 |
| OTU26  | OTU49 | -0.7214 | negative | 0.72 |
| OTU39  | OTU49 | 0.7222  | positive | 0.72 |
| OTU6   | OTU49 | 0.7235  | positive | 0.72 |
| OTU15  | OTU5  | 0.8597  | positive | 0.86 |

|        |       |         |          |      |
|--------|-------|---------|----------|------|
| OTU25  | OTU51 | 0.7097  | positive | 0.71 |
| OTU16  | OTU51 | 0.7201  | positive | 0.72 |
| OTU15  | OTU51 | 0.7157  | positive | 0.72 |
| OTU20  | OTU51 | 0.7296  | positive | 0.73 |
| OTU42  | OTU52 | 0.7006  | positive | 0.70 |
| OTU67  | OTU52 | 0.7253  | positive | 0.73 |
| OTU6   | OTU52 | 0.7403  | positive | 0.74 |
| OTU40  | OTU52 | 0.7094  | positive | 0.71 |
| OTU36  | OTU52 | 0.7236  | positive | 0.72 |
| OTU1   | OTU52 | 0.7166  | positive | 0.72 |
| OTU70  | OTU52 | 0.7309  | positive | 0.73 |
| OTU292 | OTU53 | 0.7006  | positive | 0.70 |
| OTU11  | OTU53 | 0.7045  | positive | 0.70 |
| OTU25  | OTU53 | 0.7547  | positive | 0.75 |
| OTU8   | OTU55 | -0.8130 | negative | 0.81 |
| OTU142 | OTU55 | -0.6987 | negative | 0.70 |
| OTU13  | OTU55 | -0.7214 | negative | 0.72 |
| OTU42  | OTU55 | 0.7084  | positive | 0.71 |
| OTU40  | OTU55 | 0.7110  | positive | 0.71 |
| OTU71  | OTU55 | 0.7149  | positive | 0.71 |
| OTU1   | OTU55 | 0.7144  | positive | 0.71 |
| OTU16  | OTU55 | 0.7365  | positive | 0.74 |
| OTU59  | OTU55 | 0.7508  | positive | 0.75 |
| OTU25  | OTU55 | 0.7273  | positive | 0.73 |
| OTU292 | OTU55 | 0.7455  | positive | 0.75 |
| OTU44  | OTU55 | 0.7166  | positive | 0.72 |
| OTU5   | OTU56 | -0.7013 | negative | 0.70 |
| OTU15  | OTU56 | -0.7831 | negative | 0.78 |
| OTU93  | OTU56 | -0.7143 | negative | 0.71 |
| OTU8   | OTU56 | 0.7288  | positive | 0.73 |
| OTU10  | OTU56 | 0.8013  | positive | 0.80 |
| OTU63  | OTU57 | -0.7675 | negative | 0.77 |
| OTU378 | OTU57 | -0.7253 | negative | 0.73 |
| OTU6   | OTU57 | 0.7469  | positive | 0.75 |
| OTU39  | OTU57 | 0.7387  | positive | 0.74 |
| OTU43  | OTU58 | -0.7435 | negative | 0.74 |
| OTU56  | OTU59 | -0.7831 | negative | 0.78 |
| OTU8   | OTU59 | -0.7442 | negative | 0.74 |
| OTU10  | OTU59 | -0.7214 | negative | 0.72 |
| OTU221 | OTU59 | -0.7162 | negative | 0.72 |
| OTU2   | OTU59 | 0.7339  | positive | 0.73 |
| OTU16  | OTU59 | 0.7119  | positive | 0.71 |
| OTU2   | OTU6  | 0.7196  | positive | 0.72 |
| OTU1   | OTU6  | 0.7675  | positive | 0.77 |
| OTU59  | OTU60 | -0.7312 | negative | 0.73 |
| OTU70  | OTU60 | -0.7091 | negative | 0.71 |
| OTU93  | OTU60 | -0.7052 | negative | 0.71 |
| OTU104 | OTU60 | -0.7416 | negative | 0.74 |
| OTU71  | OTU60 | -0.7130 | negative | 0.71 |
| OTU109 | OTU60 | -0.7039 | negative | 0.70 |

|        |       |         |          |      |
|--------|-------|---------|----------|------|
| OTU16  | OTU60 | -0.7435 | negative | 0.74 |
| OTU61  | OTU60 | -0.7396 | negative | 0.74 |
| OTU15  | OTU60 | -0.7344 | negative | 0.73 |
| OTU42  | OTU60 | -0.7188 | negative | 0.72 |
| OTU2   | OTU60 | -0.7149 | negative | 0.71 |
| OTU40  | OTU60 | -0.7149 | negative | 0.71 |
| OTU55  | OTU60 | -0.7110 | negative | 0.71 |
| OTU292 | OTU60 | -0.7071 | negative | 0.71 |
| OTU5   | OTU60 | -0.7058 | negative | 0.71 |
| OTU13  | OTU60 | 0.7136  | positive | 0.71 |
| OTU76  | OTU60 | 0.7326  | positive | 0.73 |
| OTU142 | OTU60 | 0.7547  | positive | 0.75 |
| OTU10  | OTU60 | 0.7935  | positive | 0.79 |
| OTU8   | OTU60 | 0.8052  | positive | 0.81 |
| OTU56  | OTU60 | 0.8065  | positive | 0.81 |
| OTU56  | OTU61 | -0.7377 | negative | 0.74 |
| OTU17  | OTU61 | -0.7143 | negative | 0.71 |
| OTU5   | OTU61 | 0.6994  | positive | 0.70 |
| OTU24  | OTU62 | 0.8208  | positive | 0.82 |
| OTU24  | OTU63 | -0.7714 | negative | 0.77 |
| OTU62  | OTU63 | -0.7610 | negative | 0.76 |
| OTU1   | OTU63 | -0.7182 | negative | 0.72 |
| OTU6   | OTU63 | -0.7084 | negative | 0.71 |
| OTU21  | OTU63 | 0.7222  | positive | 0.72 |
| OTU221 | OTU64 | -0.7208 | negative | 0.72 |
| OTU56  | OTU64 | -0.7344 | negative | 0.73 |
| OTU15  | OTU64 | 0.7131  | positive | 0.71 |
| OTU22  | OTU64 | 0.7131  | positive | 0.71 |
| OTU5   | OTU64 | 0.7196  | positive | 0.72 |
| OTU7   | OTU64 | 0.7351  | positive | 0.74 |
| OTU321 | OTU65 | -0.7182 | negative | 0.72 |
| OTU56  | OTU65 | -0.7097 | negative | 0.71 |
| OTU55  | OTU65 | 0.7071  | positive | 0.71 |
| OTU24  | OTU65 | 0.7170  | positive | 0.72 |
| OTU1   | OTU65 | 0.7443  | positive | 0.74 |
| OTU61  | OTU65 | 0.7275  | positive | 0.73 |
| OTU44  | OTU65 | 0.7301  | positive | 0.73 |
| OTU63  | OTU66 | 0.7416  | positive | 0.74 |
| OTU17  | OTU67 | -0.7078 | negative | 0.71 |
| OTU378 | OTU67 | -0.7240 | negative | 0.72 |
| OTU59  | OTU67 | 0.7274  | positive | 0.73 |
| OTU2   | OTU67 | 0.7300  | positive | 0.73 |
| OTU42  | OTU67 | 0.7326  | positive | 0.73 |
| OTU1   | OTU67 | 0.7456  | positive | 0.75 |
| OTU19  | OTU7  | 0.7210  | positive | 0.72 |
| OTU10  | OTU70 | -0.7792 | negative | 0.78 |
| OTU56  | OTU70 | -0.7390 | negative | 0.74 |
| OTU8   | OTU70 | -0.7286 | negative | 0.73 |
| OTU13  | OTU70 | -0.7357 | negative | 0.74 |
| OTU142 | OTU70 | -0.7097 | negative | 0.71 |



|          |          |         |          |      |
|----------|----------|---------|----------|------|
| OTU93    | OTU70    | 0.7058  | positive | 0.71 |
| OTU1     | OTU70    | 0.7469  | positive | 0.75 |
| OTU5     | OTU70    | 0.7299  | positive | 0.73 |
| OTU51    | OTU70    | 0.7158  | positive | 0.72 |
| OTU42    | OTU70    | 0.7117  | positive | 0.71 |
| OTU2     | OTU70    | 0.7870  | positive | 0.79 |
| OTU15    | OTU70    | 0.7948  | positive | 0.79 |
| OTU8     | OTU71    | -0.7065 | negative | 0.71 |
| OTU13    | OTU71    | -0.7422 | negative | 0.74 |
| OTU70    | OTU71    | 0.7136  | positive | 0.71 |
| OTU6     | OTU71    | 0.7547  | positive | 0.75 |
| OTU1     | OTU71    | 0.7260  | positive | 0.73 |
| OTU42    | OTU76    | -0.7052 | negative | 0.71 |
| OTU8     | OTU76    | 0.7000  | positive | 0.70 |
| OTU8     | OTU83    | -0.7117 | negative | 0.71 |
| OTU13    | OTU83    | -0.7403 | negative | 0.74 |
| OTU76    | OTU83    | -0.7026 | negative | 0.70 |
| OTU142   | OTU83    | -0.7149 | negative | 0.71 |
| OTU59    | OTU83    | 0.7032  | positive | 0.70 |
| OTU71    | OTU83    | 0.7352  | positive | 0.74 |
| OTU19    | OTU83    | 0.7403  | positive | 0.74 |
| OTU45    | OTU83    | 0.7270  | positive | 0.73 |
| OTU19    | OTU9     | 0.7442  | positive | 0.74 |
| OTU10    | OTU93    | -0.7870 | negative | 0.79 |
| OTU15    | OTU93    | 0.7006  | positive | 0.70 |
| OTU111   | PNP      | -0.7182 | negative | 0.72 |
| OTU55    | PNP      | -0.7227 | negative | 0.72 |
| OTU44    | PNP      | -0.7201 | negative | 0.72 |
| OTU17    | PNP      | 0.7092  | positive | 0.71 |
| GLUT9    | PNP      | 0.7276  | positive | 0.73 |
| OTU34    | PNP      | 0.7508  | positive | 0.75 |
| Serum UA | PNP      | 0.7623  | positive | 0.76 |
| OTU26    | Serum UA | 0.8630  | positive | 0.86 |
| OTU321   | URAT1    | -0.8416 | negative | 0.84 |
| OTU378   | URAT1    | -0.7727 | negative | 0.77 |
| OTU71    | URAT1    | 0.7032  | positive | 0.70 |
| OTU39    | URAT1    | 0.7118  | positive | 0.71 |
| OTU19    | URAT1    | 0.7508  | positive | 0.75 |
| OTU6     | URAT1    | 0.7273  | positive | 0.73 |
| OTU14    | URAT1    | 0.7416  | positive | 0.74 |
| ABCG2    | URAT1    | 0.7171  | positive | 0.72 |
| NPT1     | URAT1    | 0.7288  | positive | 0.73 |
| OTU49    | URAT1    | 0.7257  | positive | 0.73 |
| OTU1     | URAT1    | 0.7296  | positive | 0.73 |
| PNP      | XOD      | 0.7547  | positive | 0.75 |
| GLUT9    | XOD      | 0.7284  | positive | 0.73 |
| Serum UA | XOD      | 0.7805  | positive | 0.78 |

**Table S11. Nodes information in multi-omic network analysis given by Fig. S3C.**

| Group            | Node           | Weight degree | Eigenvector centrality | Betweenness centrality | Closeness centrality | Degree |
|------------------|----------------|---------------|------------------------|------------------------|----------------------|--------|
| serum metabolite | Serum UA       | 8.4148        | 9.29E-06               | 986                    | 2.83E-04             | 10     |
| gut metabolite   | Valine         | 1.5294        | 3.94E-03               | 175                    | 2.70E-04             | 2      |
| gut metabolite   | Taurine        | 2.2907        | 5.72E-03               | 652                    | 2.76E-04             | 3      |
| gut metabolite   | Creatine       | 0.7380        | 3.33E-04               | 0                      | 2.65E-04             | 1      |
| gut metabolite   | Choline        | 4.6064        | 1.31E-04               | 0                      | 2.62E-04             | 6      |
| gut metabolite   | Alphaarabinose | 2.9457        | 2.35E-01               | 0                      | 2.75E-04             | 4      |
| gut metabolite   | Nicotinate     | 1.6054        | 7.85E-04               | 91                     | 2.68E-04             | 2      |
| gut metabolite   | Tryptophan     | 1.5625        | 0.00E+00               | 300                    | 2.62E-04             | 2      |
| gut metabolite   | Hypoxanthine   | 1.6766        | 0.00E+00               | 0                      | 2.66E-04             | 2      |
| gut metabolite   | Urocanate      | 2.3853        | 0.00E+00               | 155                    | 2.69E-04             | 3      |
| gut metabolite   | Butyrate       | 2.3814        | 2.36E-05               | 98                     | 2.69E-04             | 3      |
| gut metabolite   | Betagalactose  | 7.0390        | 8.84E-03               | 1115                   | 2.81E-04             | 9      |
| gut metabolite   | Alphaglucose   | 2.3303        | 0.00E+00               | 0                      | 2.73E-04             | 3      |
| gut metabolite   | Lactate        | 6.6441        | 0.00E+00               | 735                    | 2.74E-04             | 8      |
| gut metabolite   | Propionate     | 7.4718        | 0.00E+00               | 626                    | 2.81E-04             | 9      |
| gut metabolite   | Betaxylose     | 7.2395        | 0.00E+00               | 1171                   | 2.78E-04             | 9      |
| gut metabolite   | Isoleucine     | 6.7953        | 0.00E+00               | 0                      | 2.81E-04             | 8      |
| gut metabolite   | Glycine        | 6.5973        | 0.00E+00               | 87                     | 2.80E-04             | 8      |
| gut metabolite   | Phenylacetate  | 6.8500        | 0.00E+00               | 73                     | 2.75E-04             | 8      |
| gut metabolite   | Betaglucose    | 3.3046        | 7.01E-04               | 860                    | 2.79E-04             | 4      |
| microbiota       | OTU145         | 0.7888        | 0.00E+00               | 0                      | 2.64E-04             | 1      |
| microbiota       | OTU124         | 0.8310        | 0.00E+00               | 0                      | 2.33E-04             | 1      |
| microbiota       | OTU95          | 0.8347        | 0.00E+00               | 0                      | 2.53E-04             | 1      |
| microbiota       | OTU157         | 1.6489        | 0.00E+00               | 206                    | 2.42E-04             | 2      |
| microbiota       | OTU102         | 0.9150        | 0.00E+00               | 0                      | 2.45E-04             | 1      |
| microbiota       | OTU125         | 0.7363        | 1.08E-04               | 0                      | 2.65E-04             | 1      |
| microbiota       | OTU108         | 1.4844        | 5.70E-04               | 0                      | 2.65E-04             | 2      |
| microbiota       | OTU130         | 2.2408        | 3.14E-04               | 247                    | 2.77E-04             | 3      |
| microbiota       | OTU27          | 3.1110        | 3.98E-04               | 237                    | 2.79E-04             | 4      |
| microbiota       | OTU114         | 1.4515        | 2.10E-05               | 415                    | 2.65E-04             | 2      |
| microbiota       | OTU176         | 1.5896        | 0.00E+00               | 410                    | 2.52E-04             | 2      |
| microbiota       | OTU166         | 1.5010        | 0.00E+00               | 0                      | 2.69E-04             | 2      |
| microbiota       | OTU549         | 3.1361        | 3.29E-04               | 262                    | 2.75E-04             | 4      |
| microbiota       | OTU160         | 2.5705        | 0.00E+00               | 206                    | 2.65E-04             | 3      |
| microbiota       | OTU118         | 1.6277        | 6.20E-05               | 130                    | 2.72E-04             | 2      |
| microbiota       | OTU175         | 1.5256        | 3.51E-06               | 76                     | 2.63E-04             | 2      |
| microbiota       | OTU69          | 1.5964        | 2.77E-03               | 13                     | 2.70E-04             | 2      |
| microbiota       | OTU435         | 2.9804        | 5.27E-03               | 583                    | 2.80E-04             | 4      |
| microbiota       | OTU57          | 0.7539        | 0.00E+00               | 0                      | 2.55E-04             | 1      |
| microbiota       | OTU588         | 3.8465        | 1.13E-02               | 2324                   | 2.87E-04             | 5      |
| microbiota       | OTU235         | 3.7825        | 1.54E-03               | 536                    | 2.83E-04             | 5      |
| microbiota       | OTU96          | 4.6144        | 8.03E-04               | 525                    | 2.80E-04             | 6      |
| microbiota       | OTU199         | 3.2534        | 2.90E-06               | 0                      | 2.72E-04             | 4      |
| microbiota       | OTU310         | 1.6963        | 0.00E+00               | 206                    | 2.56E-04             | 2      |
| microbiota       | OTU155         | 4.2053        | 0.00E+00               | 38                     | 2.74E-04             | 5      |
| microbiota       | OTU462         | 0.7134        | 0.00E+00               | 0                      | 2.49E-04             | 1      |
| microbiota       | OTU67          | 1.4971        | 0.00E+00               | 206                    | 2.59E-04             | 2      |

|            |        |         |          |      |          |    |
|------------|--------|---------|----------|------|----------|----|
| microbiota | OTU149 | 3.1535  | 0.00E+00 | 165  | 2.72E-04 | 4  |
| microbiota | OTU88  | 6.3264  | 0.00E+00 | 438  | 2.70E-04 | 8  |
| microbiota | OTU306 | 2.4563  | 0.00E+00 | 0    | 2.77E-04 | 3  |
| microbiota | OTU431 | 1.4808  | 0.00E+00 | 83   | 2.62E-04 | 2  |
| microbiota | OTU31  | 2.2693  | 1.70E-03 | 1    | 2.72E-04 | 3  |
| microbiota | OTU113 | 11.9919 | 8.87E-01 | 0    | 2.78E-04 | 13 |
| microbiota | OTU184 | 7.0929  | 2.98E-01 | 571  | 2.82E-04 | 9  |
| microbiota | OTU54  | 1.5131  | 0.00E+00 | 410  | 2.67E-04 | 2  |
| microbiota | OTU36  | 1.5069  | 0.00E+00 | 724  | 2.69E-04 | 2  |
| microbiota | OTU33  | 3.6840  | 3.30E-05 | 1783 | 2.78E-04 | 5  |
| microbiota | OTU537 | 2.1752  | 0.00E+00 | 419  | 2.65E-04 | 3  |
| microbiota | OTU37  | 5.7052  | 0.00E+00 | 701  | 2.71E-04 | 7  |
| microbiota | OTU80  | 3.1265  | 0.00E+00 | 319  | 2.58E-04 | 4  |
| microbiota | OTU110 | 2.5859  | 0.00E+00 | 0    | 2.54E-04 | 3  |
| microbiota | OTU44  | 1.5417  | 0.00E+00 | 0    | 2.49E-04 | 2  |
| microbiota | OTU548 | 0.7617  | 0.00E+00 | 0    | 2.60E-04 | 1  |
| microbiota | OTU259 | 6.9736  | 0.00E+00 | 0    | 2.70E-04 | 8  |
| microbiota | OTU90  | 5.6544  | 0.00E+00 | 89   | 2.62E-04 | 7  |
| microbiota | OTU94  | 6.1328  | 0.00E+00 | 0    | 2.68E-04 | 7  |
| microbiota | OTU82  | 6.9276  | 0.00E+00 | 0    | 2.71E-04 | 8  |
| microbiota | OTU71  | 5.0943  | 0.00E+00 | 0    | 2.60E-04 | 6  |
| microbiota | OTU123 | 6.5341  | 0.00E+00 | 1334 | 2.80E-04 | 8  |
| microbiota | OTU23  | 6.4107  | 0.00E+00 | 250  | 2.71E-04 | 8  |
| microbiota | OTU481 | 12.3583 | 6.86E-01 | 1209 | 2.84E-04 | 16 |
| microbiota | OTU200 | 10.0861 | 5.85E-01 | 228  | 2.80E-04 | 13 |
| microbiota | OTU223 | 5.3608  | 0.00E+00 | 1052 | 2.79E-04 | 7  |
| microbiota | OTU106 | 1.5258  | 2.89E-05 | 0    | 2.61E-04 | 2  |
| microbiota | OTU100 | 3.1714  | 3.15E-02 | 151  | 2.80E-04 | 4  |
| microbiota | OTU505 | 3.6588  | 5.55E-04 | 1249 | 2.77E-04 | 5  |
| microbiota | OTU143 | 4.9200  | 1.46E-04 | 0    | 2.61E-04 | 6  |
| microbiota | OTU461 | 4.0225  | 1.70E-04 | 361  | 2.71E-04 | 5  |
| microbiota | OTU55  | 2.2410  | 1.60E-04 | 264  | 2.75E-04 | 3  |
| microbiota | OTU32  | 2.1946  | 5.98E-02 | 393  | 2.74E-04 | 3  |
| microbiota | OTU59  | 2.1557  | 3.49E-03 | 445  | 2.73E-04 | 3  |
| microbiota | OTU109 | 3.4459  | 0.00E+00 | 0    | 2.70E-04 | 4  |
| microbiota | OTU336 | 2.5267  | 0.00E+00 | 0    | 2.62E-04 | 3  |
| microbiota | OTU28  | 4.0754  | 0.00E+00 | 656  | 2.70E-04 | 5  |
| microbiota | OTU51  | 3.0504  | 0.00E+00 | 735  | 2.74E-04 | 4  |
| microbiota | OTU63  | 3.0061  | 8.16E-03 | 1295 | 2.84E-04 | 4  |
| microbiota | OTU52  | 1.6247  | 0.00E+00 | 28   | 2.64E-04 | 2  |
| microbiota | OTU46  | 3.8702  | 0.00E+00 | 0    | 2.71E-04 | 5  |
| microbiota | OTU158 | 5.9830  | 1.00E-05 | 0    | 2.71E-04 | 7  |
| microbiota | OTU451 | 6.8569  | 7.30E-05 | 0    | 2.74E-04 | 8  |
| microbiota | OTU81  | 5.4539  | 2.66E-05 | 7    | 2.70E-04 | 7  |
| microbiota | OTU410 | 2.3771  | 0.00E+00 | 283  | 2.61E-04 | 3  |
| microbiota | OTU239 | 6.1563  | 1.16E-05 | 420  | 2.70E-04 | 7  |
| microbiota | OTU616 | 13.5314 | 9.51E-01 | 2    | 2.79E-04 | 15 |
| microbiota | OTU150 | 12.4998 | 8.58E-01 | 38   | 2.79E-04 | 15 |
| microbiota | OTU101 | 14.2479 | 9.73E-01 | 0    | 2.79E-04 | 16 |
| microbiota | OTU34  | 14.1378 | 9.67E-01 | 2    | 2.79E-04 | 16 |

|            |        |         |          |      |          |    |
|------------|--------|---------|----------|------|----------|----|
| microbiota | OTU45  | 1.5902  | 3.38E-02 | 0    | 2.69E-04 | 2  |
| microbiota | OTU64  | 7.4413  | 4.06E-01 | 360  | 2.81E-04 | 10 |
| microbiota | OTU488 | 6.6715  | 1.96E-02 | 55   | 2.75E-04 | 8  |
| microbiota | OTU318 | 1.4785  | 6.61E-04 | 0    | 2.61E-04 | 2  |
| microbiota | OTU30  | 4.3992  | 3.28E-03 | 4    | 2.69E-04 | 6  |
| microbiota | OTU137 | 14.3930 | 9.10E-01 | 448  | 2.83E-04 | 17 |
| microbiota | OTU91  | 6.1652  | 1.89E-01 | 1129 | 2.86E-04 | 8  |
| microbiota | OTU213 | 3.1404  | 2.10E-02 | 1012 | 2.83E-04 | 4  |
| microbiota | OTU292 | 3.7510  | 1.17E-01 | 1155 | 2.82E-04 | 5  |
| microbiota | OTU72  | 2.2187  | 0.00E+00 | 206  | 2.66E-04 | 3  |
| microbiota | OTU16  | 0.7642  | 0.00E+00 | 0    | 2.55E-04 | 1  |
| microbiota | OTU185 | 1.5490  | 0.00E+00 | 195  | 2.63E-04 | 2  |
| microbiota | OTU22  | 2.3242  | 4.24E-05 | 208  | 2.65E-04 | 3  |
| microbiota | OTU169 | 2.9997  | 8.36E-04 | 112  | 2.66E-04 | 4  |
| microbiota | OTU41  | 3.0924  | 4.08E-04 | 213  | 2.71E-04 | 4  |
| microbiota | OTU335 | 3.0584  | 1.04E-01 | 397  | 2.78E-04 | 4  |
| microbiota | OTU7   | 2.2510  | 7.30E-03 | 804  | 2.76E-04 | 3  |
| microbiota | OTU115 | 6.9450  | 0.00E+00 | 498  | 2.76E-04 | 8  |
| microbiota | OTU476 | 7.8064  | 0.00E+00 | 548  | 2.79E-04 | 9  |
| microbiota | OTU56  | 4.3698  | 0.00E+00 | 0    | 2.66E-04 | 5  |
| microbiota | OTU73  | 5.5065  | 3.79E-04 | 672  | 2.75E-04 | 7  |
| microbiota | OTU29  | 6.9765  | 0.00E+00 | 102  | 2.69E-04 | 8  |
| microbiota | OTU221 | 5.4207  | 0.00E+00 | 0    | 2.69E-04 | 6  |
| microbiota | OTU139 | 9.1448  | 1.33E-04 | 407  | 2.78E-04 | 11 |
| microbiota | OTU517 | 8.4920  | 1.22E-04 | 109  | 2.78E-04 | 10 |
| microbiota | OTU164 | 8.2546  | 1.36E-04 | 218  | 2.80E-04 | 10 |
| microbiota | OTU119 | 10.8153 | 1.53E-04 | 649  | 2.82E-04 | 13 |
| microbiota | OTU487 | 7.7992  | 4.65E-05 | 830  | 2.81E-04 | 10 |
| microbiota | OTU68  | 4.5027  | 5.12E-05 | 1319 | 2.83E-04 | 6  |
| microbiota | OTU128 | 12.5128 | 7.97E-01 | 671  | 2.83E-04 | 15 |
| microbiota | OTU14  | 0.7102  | 4.66E-02 | 0    | 2.72E-04 | 1  |
| microbiota | OTU142 | 5.2058  | 1.29E-03 | 1161 | 2.83E-04 | 7  |
| microbiota | OTU60  | 8.4723  | 0.00E+00 | 656  | 2.79E-04 | 10 |
| microbiota | OTU49  | 8.7976  | 9.06E-05 | 1342 | 2.83E-04 | 11 |
| microbiota | OTU86  | 3.6597  | 0.00E+00 | 39   | 2.75E-04 | 5  |
| microbiota | OTU103 | 6.5651  | 0.00E+00 | 254  | 2.77E-04 | 8  |
| microbiota | OTU356 | 4.7970  | 0.00E+00 | 113  | 2.73E-04 | 6  |
| microbiota | OTU76  | 7.7080  | 5.70E-05 | 128  | 2.77E-04 | 9  |
| microbiota | OTU10  | 7.5921  | 0.00E+00 | 67   | 2.75E-04 | 9  |
| microbiota | OTU39  | 9.1169  | 4.10E-05 | 413  | 2.79E-04 | 11 |
| microbiota | OTU62  | 8.7000  | 5.96E-04 | 1928 | 2.86E-04 | 11 |
| microbiota | OTU24  | 7.3691  | 1.54E-04 | 219  | 2.82E-04 | 9  |
| microbiota | OTU8   | 9.6333  | 1.25E-04 | 515  | 2.83E-04 | 12 |
| microbiota | OTU172 | 9.3616  | 7.86E-03 | 557  | 2.74E-04 | 12 |
| microbiota | OTU211 | 10.6318 | 1.82E-02 | 1283 | 2.81E-04 | 13 |
| microbiota | OTU190 | 9.8786  | 9.73E-03 | 5    | 2.69E-04 | 11 |
| microbiota | OTU121 | 8.0922  | 7.37E-03 | 226  | 2.72E-04 | 10 |
| microbiota | OTU146 | 9.1591  | 7.90E-03 | 220  | 2.71E-04 | 11 |
| microbiota | OTU87  | 9.3667  | 1.89E-02 | 288  | 2.78E-04 | 11 |
| microbiota | OTU61  | 10.5201 | 1.92E-02 | 120  | 2.78E-04 | 12 |

|            |        |         |          |      |          |    |
|------------|--------|---------|----------|------|----------|----|
| microbiota | OTU18  | 9.7831  | 9.62E-03 | 0    | 2.69E-04 | 11 |
| microbiota | OTU93  | 9.0096  | 9.31E-03 | 0    | 2.69E-04 | 10 |
| microbiota | OTU25  | 7.9400  | 7.88E-03 | 0    | 2.71E-04 | 9  |
| microbiota | OTU459 | 5.6623  | 0.00E+00 | 609  | 2.76E-04 | 7  |
| microbiota | OTU112 | 2.3656  | 2.49E-06 | 406  | 2.66E-04 | 3  |
| microbiota | OTU116 | 2.1999  | 7.94E-03 | 1077 | 2.81E-04 | 3  |
| microbiota | OTU58  | 10.7454 | 7.65E-01 | 44   | 2.79E-04 | 13 |
| microbiota | OTU21  | 7.5364  | 4.44E-01 | 393  | 2.78E-04 | 10 |
| microbiota | OTU5   | 3.7328  | 1.28E-01 | 1076 | 2.82E-04 | 5  |
| microbiota | OTU131 | 7.7418  | 1.67E-01 | 2885 | 2.86E-04 | 10 |
| microbiota | OTU104 | 13.0725 | 8.27E-01 | 1220 | 2.85E-04 | 16 |
| microbiota | OTU151 | 2.9631  | 3.22E-05 | 0    | 2.75E-04 | 4  |
| microbiota | OTU153 | 4.4863  | 1.62E-03 | 613  | 2.79E-04 | 6  |
| microbiota | OTU424 | 7.4069  | 5.59E-04 | 193  | 2.78E-04 | 9  |
| microbiota | OTU321 | 2.1350  | 5.52E-04 | 268  | 2.72E-04 | 3  |
| microbiota | OTU84  | 6.3652  | 1.31E-04 | 334  | 2.77E-04 | 8  |
| microbiota | OTU40  | 3.8733  | 7.88E-03 | 528  | 2.77E-04 | 5  |
| microbiota | OTU53  | 7.0649  | 1.26E-04 | 1367 | 2.81E-04 | 9  |
| microbiota | OTU70  | 6.3940  | 4.82E-06 | 1234 | 2.79E-04 | 8  |
| microbiota | OTU15  | 7.1002  | 7.02E-04 | 853  | 2.79E-04 | 9  |
| microbiota | OTU563 | 6.5592  | 6.81E-02 | 683  | 2.77E-04 | 8  |
| microbiota | OTU48  | 6.2735  | 8.02E-03 | 1    | 2.69E-04 | 7  |
| microbiota | OTU136 | 3.0349  | 0.00E+00 | 455  | 2.70E-04 | 4  |
| microbiota | OTU295 | 5.4475  | 8.81E-03 | 1523 | 2.77E-04 | 7  |
| microbiota | OTU43  | 6.2091  | 7.12E-04 | 407  | 2.71E-04 | 8  |
| microbiota | OTU4   | 3.1286  | 5.73E-04 | 373  | 2.71E-04 | 4  |
| microbiota | OTU649 | 3.1127  | 5.23E-04 | 407  | 2.71E-04 | 4  |
| microbiota | OTU2   | 0.7522  | 1.60E-05 | 0    | 2.60E-04 | 1  |
| microbiota | OTU170 | 3.7854  | 1.55E-03 | 1303 | 2.84E-04 | 5  |
| microbiota | OTU75  | 3.9611  | 3.15E-06 | 385  | 2.77E-04 | 5  |
| microbiota | OTU74  | 3.8021  | 0.00E+00 | 761  | 2.75E-04 | 5  |
| microbiota | OTU111 | 4.6397  | 1.25E-02 | 1271 | 2.87E-04 | 6  |
| microbiota | OTU1   | 3.1664  | 8.09E-04 | 669  | 2.79E-04 | 4  |
| microbiota | OTU6   | 2.2434  | 5.99E-02 | 334  | 2.79E-04 | 3  |
| microbiota | OTU180 | 7.2324  | 9.05E-03 | 0    | 2.72E-04 | 8  |
| microbiota | OTU469 | 9.5004  | 9.16E-03 | 393  | 2.74E-04 | 11 |
| microbiota | OTU475 | 8.0624  | 9.04E-03 | 1    | 2.74E-04 | 9  |
| microbiota | OTU83  | 8.0400  | 9.28E-03 | 93   | 2.73E-04 | 9  |
| microbiota | OTU11  | 8.3657  | 4.60E-03 | 173  | 2.72E-04 | 10 |
| microbiota | OTU19  | 6.7120  | 9.17E-03 | 33   | 2.73E-04 | 8  |
| microbiota | OTU66  | 5.2640  | 9.02E-02 | 2109 | 2.85E-04 | 7  |
| microbiota | OTU12  | 2.3493  | 3.22E-04 | 673  | 2.74E-04 | 3  |
| microbiota | OTU99  | 7.7273  | 6.94E-04 | 126  | 2.69E-04 | 9  |
| microbiota | OTU134 | 5.8406  | 1.58E-04 | 0    | 2.60E-04 | 7  |
| microbiota | OTU135 | 8.4015  | 7.28E-04 | 509  | 2.70E-04 | 10 |
| microbiota | OTU394 | 8.0264  | 2.22E-04 | 178  | 2.64E-04 | 10 |
| microbiota | OTU35  | 7.6791  | 6.73E-04 | 289  | 2.69E-04 | 9  |
| microbiota | OTU17  | 6.8602  | 1.52E-04 | 207  | 2.63E-04 | 8  |
| microbiota | OTU97  | 15.5447 | 9.77E-01 | 461  | 2.80E-04 | 18 |
| microbiota | OTU129 | 15.6176 | 9.83E-01 | 191  | 2.82E-04 | 18 |

|            |                 |         |          |      |          |    |
|------------|-----------------|---------|----------|------|----------|----|
| microbiota | OTU65           | 13.4767 | 9.13E-01 | 528  | 2.83E-04 | 15 |
| microbiota | OTU397          | 15.6540 | 1.00E+00 | 91   | 2.80E-04 | 18 |
| microbiota | OTU378          | 2.3830  | 0.00E+00 | 436  | 2.64E-04 | 3  |
| microbiota | OTU20           | 2.3429  | 1.28E-02 | 222  | 2.74E-04 | 3  |
| microbiota | OTU105          | 5.5665  | 0.00E+00 | 910  | 2.78E-04 | 7  |
| microbiota | OTU50           | 2.3322  | 0.00E+00 | 762  | 2.63E-04 | 3  |
| microbiota | OTU38           | 4.9337  | 0.00E+00 | 659  | 2.69E-04 | 6  |
| microbiota | OTU107          | 1.4923  | 2.07E-04 | 105  | 2.66E-04 | 2  |
| microbiota | OTU191          | 6.0991  | 2.06E-03 | 807  | 2.76E-04 | 8  |
| microbiota | Lachnospiraceae | 6.7324  | 5.98E-04 | 2867 | 2.86E-04 | 9  |
| microbiota | L. johnsonii    | 8.6976  | 4.33E-05 | 1005 | 2.81E-04 | 11 |

---

**Table S12. Edges information in multi-omic network analysis given by Fig. 3C.**

| Node 1        | Node 2          | Correlation | Relationship | Weight |
|---------------|-----------------|-------------|--------------|--------|
| Serum UA      | Isoleucine      | -0.9280     | negative     | 0.93   |
| Serum UA      | Glycine         | -0.8876     | negative     | 0.89   |
| Serum UA      | Betaxylose      | -0.8852     | negative     | 0.89   |
| Serum UA      | Phenylacetate   | -0.8804     | negative     | 0.88   |
| Serum UA      | Propionate      | -0.8697     | negative     | 0.87   |
| Serum UA      | Lactate         | -0.8464     | negative     | 0.85   |
| Glycine       | L. johnsonii    | -0.8398     | negative     | 0.84   |
| Alphagluucose | L. johnsonii    | -0.8261     | negative     | 0.83   |
| OTU435        | OTU549          | -0.8163     | negative     | 0.82   |
| Serum UA      | Betagluucose    | -0.8131     | negative     | 0.81   |
| Valine        | OTU6            | -0.8000     | negative     | 0.80   |
| Glycine       | Lachnospiraceae | -0.7990     | negative     | 0.80   |
| Betagluucose  | L. johnsonii    | -0.7894     | negative     | 0.79   |
| Taurine       | OTU12           | -0.7826     | negative     | 0.78   |
| Serum UA      | Alphagluucose   | -0.7728     | negative     | 0.77   |
| Propionate    | L. johnsonii    | -0.7710     | negative     | 0.77   |
| Urocanate     | OTU107          | -0.7629     | negative     | 0.76   |
| Nicotinate    | OTU20           | -0.7620     | negative     | 0.76   |
| Isoleucine    | L. johnsonii    | -0.7544     | negative     | 0.75   |
| OTU131        | OTU588          | -0.7497     | negative     | 0.75   |
| OTU435        | OTU130          | -0.7379     | negative     | 0.74   |
| OTU111        | OTU91           | -0.7349     | negative     | 0.73   |
| OTU6          | OTU104          | -0.7340     | negative     | 0.73   |
| Isoleucine    | Lachnospiraceae | -0.7295     | negative     | 0.73   |
| Valine        | OTU107          | -0.7294     | negative     | 0.73   |
| OTU7          | OTU73           | -0.7291     | negative     | 0.73   |
| Tryptophan    | OTU38           | -0.7277     | negative     | 0.73   |
| Phenylacetate | L. johnsonii    | -0.7254     | negative     | 0.73   |
| OTU7          | OTU172          | -0.7238     | negative     | 0.72   |
| OTU213        | OTU142          | -0.7183     | negative     | 0.72   |
| OTU27         | OTU435          | -0.7175     | negative     | 0.72   |
| OTU53         | OTU68           | -0.7148     | negative     | 0.71   |
| OTU62         | OTU63           | -0.7139     | negative     | 0.71   |
| Propionate    | Lachnospiraceae | -0.7108     | negative     | 0.71   |
| OTU14         | OTU128          | -0.7102     | negative     | 0.71   |
| OTU6          | OTU131          | -0.7093     | negative     | 0.71   |
| OTU87         | OTU172          | 0.7079      | positive     | 0.71   |
| OTU64         | OTU34           | 0.7079      | positive     | 0.71   |
| OTU66         | OTU184          | 0.7081      | positive     | 0.71   |
| OTU5          | OTU116          | 0.7082      | positive     | 0.71   |
| Betagalactose | OTU19           | 0.7084      | positive     | 0.71   |
| OTU21         | OTU129          | 0.7085      | positive     | 0.71   |
| Serum UA      | Lachnospiraceae | 0.7086      | positive     | 0.71   |
| OTU66         | OTU435          | 0.7088      | positive     | 0.71   |
| OTU28         | OTU505          | 0.7088      | positive     | 0.71   |
| OTU62         | OTU49           | 0.7088      | positive     | 0.71   |
| OTU31         | OTU321          | 0.7097      | positive     | 0.71   |

|                 |        |        |          |      |
|-----------------|--------|--------|----------|------|
| OTU65           | OTU131 | 0.7098 | positive | 0.71 |
| OTU21           | OTU64  | 0.7100 | positive | 0.71 |
| OTU37           | OTU123 | 0.7104 | positive | 0.71 |
| OTU108          | OTU469 | 0.7106 | positive | 0.71 |
| OTU30           | OTU190 | 0.7109 | positive | 0.71 |
| OTU59           | OTU32  | 0.7111 | positive | 0.71 |
| Lachnospiraceae | OTU588 | 0.7111 | positive | 0.71 |
| OTU397          | OTU184 | 0.7112 | positive | 0.71 |
| OTU49           | OTU115 | 0.7113 | positive | 0.71 |
| OTU46           | OTU115 | 0.7115 | positive | 0.71 |
| OTU44           | OTU80  | 0.7118 | positive | 0.71 |
| OTU82           | OTU223 | 0.7121 | positive | 0.71 |
| OTU15           | OTU321 | 0.7122 | positive | 0.71 |
| OTU24           | OTU142 | 0.7128 | positive | 0.71 |
| OTU39           | OTU105 | 0.7130 | positive | 0.71 |
| OTU33           | OTU476 | 0.7131 | positive | 0.71 |
| OTU321          | OTU121 | 0.7131 | positive | 0.71 |
| OTU59           | OTU461 | 0.7132 | positive | 0.71 |
| OTU67           | OTU462 | 0.7134 | positive | 0.71 |
| OTU53           | OTU151 | 0.7135 | positive | 0.71 |
| OTU51           | OTU72  | 0.7135 | positive | 0.71 |
| OTU39           | OTU142 | 0.7136 | positive | 0.71 |
| OTU30           | OTU61  | 0.7142 | positive | 0.71 |
| OTU146          | OTU318 | 0.7143 | positive | 0.71 |
| OTU200          | OTU616 | 0.7149 | positive | 0.71 |
| OTU32           | OTU97  | 0.7150 | positive | 0.71 |
| OTU335          | OTU481 | 0.7156 | positive | 0.72 |
| OTU356          | OTU86  | 0.7157 | positive | 0.72 |
| OTU21           | OTU34  | 0.7159 | positive | 0.72 |
| OTU41           | OTU191 | 0.7159 | positive | 0.72 |
| OTU130          | OTU119 | 0.7160 | positive | 0.72 |
| OTU74           | OTU75  | 0.7162 | positive | 0.72 |
| OTU43           | OTU99  | 0.7162 | positive | 0.72 |
| OTU235          | OTU170 | 0.7162 | positive | 0.72 |
| OTU114          | OTU537 | 0.7162 | positive | 0.72 |
| OTU137          | OTU481 | 0.7164 | positive | 0.72 |
| OTU43           | OTU106 | 0.7167 | positive | 0.72 |
| OTU150          | OTU200 | 0.7168 | positive | 0.72 |
| OTU469          | OTU169 | 0.7171 | positive | 0.72 |
| OTU8            | OTU86  | 0.7173 | positive | 0.72 |
| OTU164          | OTU451 | 0.7180 | positive | 0.72 |
| OTU5            | OTU104 | 0.7187 | positive | 0.72 |
| OTU109          | OTU505 | 0.7188 | positive | 0.72 |
| Lachnospiraceae | OTU123 | 0.7191 | positive | 0.72 |
| OTU476          | OTU49  | 0.7191 | positive | 0.72 |
| OTU53           | OTU153 | 0.7196 | positive | 0.72 |
| OTU73           | OTU60  | 0.7196 | positive | 0.72 |
| OTU131          | OTU211 | 0.7199 | positive | 0.72 |
| OTU33           | OTU60  | 0.7201 | positive | 0.72 |
| OTU170          | OTU588 | 0.7216 | positive | 0.72 |



|                |              |        |          |      |
|----------------|--------------|--------|----------|------|
| OTU21          | OTU616       | 0.7218 | positive | 0.72 |
| OTU62          | OTU517       | 0.7220 | positive | 0.72 |
| OTU424         | OTU151       | 0.7225 | positive | 0.72 |
| OTU40          | OTU153       | 0.7227 | positive | 0.72 |
| Alphaarabinose | OTU129       | 0.7229 | positive | 0.72 |
| OTU62          | OTU142       | 0.7229 | positive | 0.72 |
| OTU487         | OTU119       | 0.7234 | positive | 0.72 |
| OTU64          | OTU397       | 0.7236 | positive | 0.72 |
| Betagalactose  | OTU11        | 0.7238 | positive | 0.72 |
| OTU90          | OTU537       | 0.7240 | positive | 0.72 |
| Butyrate       | Lactate      | 0.7241 | positive | 0.72 |
| OTU29          | OTU52        | 0.7246 | positive | 0.72 |
| OTU8           | OTU10        | 0.7248 | positive | 0.72 |
| OTU23          | OTU223       | 0.7254 | positive | 0.73 |
| OTU36          | OTU50        | 0.7257 | positive | 0.73 |
| OTU58          | OTU150       | 0.7260 | positive | 0.73 |
| OTU64          | OTU101       | 0.7263 | positive | 0.73 |
| OTU35          | OTU295       | 0.7264 | positive | 0.73 |
| OTU410         | OTU80        | 0.7265 | positive | 0.73 |
| OTU84          | OTU153       | 0.7270 | positive | 0.73 |
| OTU88          | OTU149       | 0.7270 | positive | 0.73 |
| OTU21          | OTU101       | 0.7272 | positive | 0.73 |
| Choline        | OTU17        | 0.7273 | positive | 0.73 |
| OTU118         | OTU235       | 0.7276 | positive | 0.73 |
| OTU86          | OTU105       | 0.7278 | positive | 0.73 |
| OTU15          | OTU84        | 0.7279 | positive | 0.73 |
| OTU21          | OTU397       | 0.7281 | positive | 0.73 |
| OTU111         | OTU235       | 0.7282 | positive | 0.73 |
| Alphaarabinose | OTU397       | 0.7286 | positive | 0.73 |
| OTU51          | OTU70        | 0.7290 | positive | 0.73 |
| OTU53          | OTU84        | 0.7294 | positive | 0.73 |
| OTU30          | OTU18        | 0.7294 | positive | 0.73 |
| OTU139         | OTU158       | 0.7297 | positive | 0.73 |
| Alphaarabinose | OTU65        | 0.7299 | positive | 0.73 |
| OTU22          | OTU169       | 0.7300 | positive | 0.73 |
| OTU34          | OTU200       | 0.7304 | positive | 0.73 |
| OTU19          | OTU11        | 0.7306 | positive | 0.73 |
| OTU25          | OTU172       | 0.7307 | positive | 0.73 |
| OTU40          | OTU424       | 0.7309 | positive | 0.73 |
| OTU59          | OTU55        | 0.7314 | positive | 0.73 |
| Propionate     | Alphaglucose | 0.7315 | positive | 0.73 |
| OTU33          | OTU54        | 0.7318 | positive | 0.73 |
| OTU394         | OTU134       | 0.7320 | positive | 0.73 |
| Betaxylose     | OTU105       | 0.7322 | positive | 0.73 |
| OTU64          | OTU481       | 0.7322 | positive | 0.73 |
| OTU129         | OTU91        | 0.7328 | positive | 0.73 |
| OTU96          | OTU517       | 0.7328 | positive | 0.73 |
| OTU64          | OTU97        | 0.7330 | positive | 0.73 |
| OTU81          | OTU164       | 0.7332 | positive | 0.73 |
| OTU43          | OTU35        | 0.7334 | positive | 0.73 |

|                 |             |        |          |      |
|-----------------|-------------|--------|----------|------|
| OTU68           | OTU164      | 0.7336 | positive | 0.73 |
| OTU62           | OTU487      | 0.7337 | positive | 0.73 |
| OTU103          | OTU487      | 0.7337 | positive | 0.73 |
| OTU58           | OTU137      | 0.7339 | positive | 0.73 |
| OTU292          | OTU137      | 0.7341 | positive | 0.73 |
| OTU20           | OTU488      | 0.7342 | positive | 0.73 |
| OTU11           | OTU191      | 0.7344 | positive | 0.73 |
| OTU101          | OTU200      | 0.7345 | positive | 0.73 |
| OTU191          | OTU505      | 0.7346 | positive | 0.73 |
| OTU549          | OTU166      | 0.7348 | positive | 0.73 |
| OTU37           | OTU537      | 0.7350 | positive | 0.73 |
| OTU116          | OTU505      | 0.7351 | positive | 0.74 |
| OTU469          | OTU191      | 0.7352 | positive | 0.74 |
| OTU114          | OTU135      | 0.7353 | positive | 0.74 |
| OTU5            | OTU40       | 0.7356 | positive | 0.74 |
| OTU30           | OTU172      | 0.7359 | positive | 0.74 |
| OTU96           | OTU451      | 0.7362 | positive | 0.74 |
| OTU125          | OTU191      | 0.7363 | positive | 0.74 |
| OTU431          | OTU175      | 0.7365 | positive | 0.74 |
| OTU83           | OTU69       | 0.7372 | positive | 0.74 |
| Lachnospiraceae | OTU223      | 0.7373 | positive | 0.74 |
| OTU33           | OTU170      | 0.7379 | positive | 0.74 |
| Creatine        | Taurine     | 0.7380 | positive | 0.74 |
| Betagalactose   | OTU66       | 0.7382 | positive | 0.74 |
| OTU87           | OTU121      | 0.7387 | positive | 0.74 |
| OTU146          | OTU121      | 0.7388 | positive | 0.74 |
| OTU88           | OTU459      | 0.7388 | positive | 0.74 |
| Choline         | OTU134      | 0.7390 | positive | 0.74 |
| OTU86           | OTU49       | 0.7392 | positive | 0.74 |
| OTU81           | OTU158      | 0.7394 | positive | 0.74 |
| OTU1            | OTU74       | 0.7401 | positive | 0.74 |
| OTU292          | OTU91       | 0.7402 | positive | 0.74 |
| OTU38           | OTU72       | 0.7411 | positive | 0.74 |
| OTU68           | OTU119      | 0.7417 | positive | 0.74 |
| OTU34           | OTU481      | 0.7418 | positive | 0.74 |
| OTU97           | OTU481      | 0.7425 | positive | 0.74 |
| OTU121          | OTU172      | 0.7427 | positive | 0.74 |
| OTU113          | OTU481      | 0.7435 | positive | 0.74 |
| L. johnsonii    | OTU55       | 0.7438 | positive | 0.74 |
| OTU21           | OTU97       | 0.7440 | positive | 0.74 |
| Glycine         | Betaxyllose | 0.7442 | positive | 0.74 |
| OTU28           | OTU431      | 0.7444 | positive | 0.74 |
| OTU356          | OTU88       | 0.7446 | positive | 0.74 |
| OTU394          | OTU143      | 0.7446 | positive | 0.74 |
| OTU30           | OTU146      | 0.7447 | positive | 0.74 |
| OTU475          | OTU191      | 0.7447 | positive | 0.74 |
| OTU8            | OTU24       | 0.7451 | positive | 0.75 |
| OTU74           | OTU136      | 0.7452 | positive | 0.75 |
| OTU53           | OTU199      | 0.7456 | positive | 0.75 |
| OTU24           | OTU68       | 0.7456 | positive | 0.75 |

|                 |            |        |          |      |
|-----------------|------------|--------|----------|------|
| OTU104          | OTU137     | 0.7456 | positive | 0.75 |
| OTU4            | OTU394     | 0.7457 | positive | 0.75 |
| OTU104          | OTU131     | 0.7461 | positive | 0.75 |
| OTU76           | OTU142     | 0.7461 | positive | 0.75 |
| OTU65           | OTU481     | 0.7470 | positive | 0.75 |
| OTU223          | OTU259     | 0.7472 | positive | 0.75 |
| OTU8            | OTU356     | 0.7473 | positive | 0.75 |
| OTU292          | OTU128     | 0.7478 | positive | 0.75 |
| OTU62           | OTU68      | 0.7479 | positive | 0.75 |
| OTU24           | OTU517     | 0.7481 | positive | 0.75 |
| OTU292          | OTU295     | 0.7483 | positive | 0.75 |
| OTU616          | OTU481     | 0.7486 | positive | 0.75 |
| OTU136          | OTU461     | 0.7486 | positive | 0.75 |
| L. johnsonii    | OTU75      | 0.7487 | positive | 0.75 |
| OTU61           | OTU131     | 0.7492 | positive | 0.75 |
| OTU397          | OTU200     | 0.7503 | positive | 0.75 |
| OTU91           | OTU184     | 0.7504 | positive | 0.75 |
| Urocanate       | Betaxylose | 0.7504 | positive | 0.75 |
| OTU48           | OTU563     | 0.7505 | positive | 0.75 |
| OTU153          | OTU211     | 0.7511 | positive | 0.75 |
| OTU101          | OTU481     | 0.7513 | positive | 0.75 |
| OTU146          | OTU211     | 0.7514 | positive | 0.75 |
| OTU2            | OTU649     | 0.7522 | positive | 0.75 |
| Choline         | OTU99      | 0.7523 | positive | 0.75 |
| OTU57           | OTU112     | 0.7539 | positive | 0.75 |
| OTU200          | OTU91      | 0.7540 | positive | 0.75 |
| OTU39           | OTU459     | 0.7544 | positive | 0.75 |
| OTU295          | OTU99      | 0.7544 | positive | 0.75 |
| OTU1            | OTU111     | 0.7547 | positive | 0.75 |
| OTU15           | OTU70      | 0.7548 | positive | 0.75 |
| OTU185          | OTU136     | 0.7550 | positive | 0.75 |
| OTU149          | OTU487     | 0.7552 | positive | 0.76 |
| Lachnospiraceae | OTU306     | 0.7560 | positive | 0.76 |
| OTU63           | OTU116     | 0.7566 | positive | 0.76 |
| OTU129          | OTU184     | 0.7569 | positive | 0.76 |
| OTU96           | OTU164     | 0.7577 | positive | 0.76 |
| OTU424          | OTU153     | 0.7578 | positive | 0.76 |
| OTU31           | OTU172     | 0.7580 | positive | 0.76 |
| OTU12           | OTU112     | 0.7581 | positive | 0.76 |
| OTU96           | OTU119     | 0.7582 | positive | 0.76 |
| OTU15           | OTU151     | 0.7595 | positive | 0.76 |
| OTU39           | OTU86      | 0.7598 | positive | 0.76 |
| OTU64           | OTU335     | 0.7609 | positive | 0.76 |
| OTU129          | OTU481     | 0.7609 | positive | 0.76 |
| OTU397          | OTU481     | 0.7610 | positive | 0.76 |
| Glycine         | Lactate    | 0.7611 | positive | 0.76 |
| OTU24           | OTU487     | 0.7611 | positive | 0.76 |
| Lactate         | OTU378     | 0.7612 | positive | 0.76 |
| OTU97           | OTU200     | 0.7615 | positive | 0.76 |
| OTU41           | OTU505     | 0.7615 | positive | 0.76 |

|                |            |        |          |      |
|----------------|------------|--------|----------|------|
| OTU23          | OTU548     | 0.7617 | positive | 0.76 |
| OTU424         | OTU199     | 0.7617 | positive | 0.76 |
| OTU100         | OTU184     | 0.7622 | positive | 0.76 |
| OTU103         | OTU88      | 0.7627 | positive | 0.76 |
| OTU15          | OTU649     | 0.7628 | positive | 0.76 |
| OTU63          | OTU66      | 0.7638 | positive | 0.76 |
| OTU16          | OTU72      | 0.7642 | positive | 0.76 |
| OTU30          | OTU318     | 0.7642 | positive | 0.76 |
| Alphaarabinose | OTU97      | 0.7643 | positive | 0.76 |
| OTU55          | OTU75      | 0.7658 | positive | 0.77 |
| OTU43          | OTU135     | 0.7658 | positive | 0.77 |
| OTU84          | OTU166     | 0.7661 | positive | 0.77 |
| OTU49          | OTU142     | 0.7664 | positive | 0.77 |
| OTU70          | OTU151     | 0.7675 | positive | 0.77 |
| OTU32          | OTU45      | 0.7685 | positive | 0.77 |
| OTU5           | OTU58      | 0.7691 | positive | 0.77 |
| OTU87          | OTU131     | 0.7695 | positive | 0.77 |
| Taurine        | OTU66      | 0.7701 | positive | 0.77 |
| Betaxylose     | Propionate | 0.7701 | positive | 0.77 |
| OTU111         | OTU96      | 0.7703 | positive | 0.77 |
| OTU487         | OTU139     | 0.7703 | positive | 0.77 |
| OTU93          | OTU488     | 0.7703 | positive | 0.77 |
| OTU25          | OTU211     | 0.7713 | positive | 0.77 |
| OTU63          | OTU100     | 0.7717 | positive | 0.77 |
| OTU50          | OTU176     | 0.7718 | positive | 0.77 |
| OTU64          | OTU66      | 0.7719 | positive | 0.77 |
| OTU70          | OTU123     | 0.7725 | positive | 0.77 |
| OTU81          | OTU119     | 0.7728 | positive | 0.77 |
| OTU239         | OTU410     | 0.7734 | positive | 0.77 |
| OTU108         | OTU169     | 0.7738 | positive | 0.77 |
| Betagalactose  | OTU83      | 0.7739 | positive | 0.77 |
| OTU221         | OTU73      | 0.7743 | positive | 0.77 |
| OTU81          | OTU139     | 0.7766 | positive | 0.78 |
| OTU378         | OTU80      | 0.7770 | positive | 0.78 |
| OTU100         | OTU91      | 0.7783 | positive | 0.78 |
| OTU137         | OTU184     | 0.7784 | positive | 0.78 |
| OTU11          | OTU169     | 0.7788 | positive | 0.78 |
| OTU200         | OTU137     | 0.7795 | positive | 0.78 |
| OTU46          | OTU476     | 0.7798 | positive | 0.78 |
| OTU29          | OTU46      | 0.7800 | positive | 0.78 |
| OTU292         | OTU213     | 0.7806 | positive | 0.78 |
| OTU33          | OTU36      | 0.7812 | positive | 0.78 |
| OTU10          | OTU149     | 0.7812 | positive | 0.78 |
| OTU54          | OTU310     | 0.7813 | positive | 0.78 |
| OTU103         | OTU105     | 0.7815 | positive | 0.78 |
| OTU8           | OTU60      | 0.7821 | positive | 0.78 |
| OTU10          | OTU487     | 0.7821 | positive | 0.78 |
| OTU70          | OTU155     | 0.7825 | positive | 0.78 |
| OTU94          | OTU90      | 0.7827 | positive | 0.78 |
| OTU104         | OTU150     | 0.7829 | positive | 0.78 |

|               |        |        |          |      |
|---------------|--------|--------|----------|------|
| OTU146        | OTU172 | 0.7830 | positive | 0.78 |
| OTU8          | OTU62  | 0.7832 | positive | 0.78 |
| OTU111        | OTU170 | 0.7833 | positive | 0.78 |
| OTU67         | OTU88  | 0.7837 | positive | 0.78 |
| OTU335        | OTU200 | 0.7838 | positive | 0.78 |
| OTU74         | OTU461 | 0.7842 | positive | 0.78 |
| OTU129        | OTU200 | 0.7853 | positive | 0.79 |
| OTU64         | OTU150 | 0.7853 | positive | 0.79 |
| OTU104        | OTU481 | 0.7856 | positive | 0.79 |
| OTU563        | OTU184 | 0.7859 | positive | 0.79 |
| OTU4          | OTU136 | 0.7861 | positive | 0.79 |
| OTU4          | OTU295 | 0.7863 | positive | 0.79 |
| OTU73         | OTU46  | 0.7865 | positive | 0.79 |
| OTU27         | OTU130 | 0.7869 | positive | 0.79 |
| Choline       | OTU35  | 0.7879 | positive | 0.79 |
| OTU58         | OTU128 | 0.7883 | positive | 0.79 |
| OTU164        | OTU517 | 0.7884 | positive | 0.79 |
| OTU145        | OTU459 | 0.7888 | positive | 0.79 |
| OTU23         | OTU123 | 0.7888 | positive | 0.79 |
| OTU649        | OTU175 | 0.7891 | positive | 0.79 |
| OTU73         | OTU115 | 0.7895 | positive | 0.79 |
| OTU64         | OTU200 | 0.7902 | positive | 0.79 |
| Choline       | OTU394 | 0.7911 | positive | 0.79 |
| OTU27         | OTU549 | 0.7917 | positive | 0.79 |
| OTU8          | OTU103 | 0.7930 | positive | 0.79 |
| OTU84         | OTU549 | 0.7933 | positive | 0.79 |
| OTU22         | OTU185 | 0.7940 | positive | 0.79 |
| OTU23         | OTU94  | 0.7940 | positive | 0.79 |
| OTU38         | OTU51  | 0.7947 | positive | 0.79 |
| OTU239        | OTU81  | 0.7955 | positive | 0.80 |
| OTU235        | OTU588 | 0.7956 | positive | 0.80 |
| OTU10         | OTU459 | 0.7970 | positive | 0.80 |
| OTU123        | OTU223 | 0.7971 | positive | 0.80 |
| OTU28         | OTU336 | 0.7975 | positive | 0.80 |
| OTU131        | OTU128 | 0.7976 | positive | 0.80 |
| Betagalactose | OTU469 | 0.7981 | positive | 0.80 |
| OTU7          | OTU335 | 0.7981 | positive | 0.80 |
| OTU62         | OTU139 | 0.7984 | positive | 0.80 |
| OTU43         | OTU394 | 0.7986 | positive | 0.80 |
| OTU150        | OTU128 | 0.7988 | positive | 0.80 |
| OTU563        | OTU481 | 0.7995 | positive | 0.80 |
| OTU8          | OTU39  | 0.7998 | positive | 0.80 |
| OTU22         | OTU41  | 0.8002 | positive | 0.80 |
| OTU134        | OTU143 | 0.8004 | positive | 0.80 |
| OTU5          | OTU21  | 0.8011 | positive | 0.80 |
| OTU90         | OTU259 | 0.8014 | positive | 0.80 |
| OTU31         | OTU211 | 0.8017 | positive | 0.80 |
| OTU66         | OTU481 | 0.8033 | positive | 0.80 |
| OTU475        | OTU563 | 0.8034 | positive | 0.80 |
| OTU15         | OTU53  | 0.8036 | positive | 0.80 |

|               |              |        |          |      |
|---------------|--------------|--------|----------|------|
| Hypoxanthine  | Betaxylose   | 0.8046 | positive | 0.80 |
| OTU17         | OTU394       | 0.8051 | positive | 0.81 |
| Betagalactose | OTU475       | 0.8052 | positive | 0.81 |
| OTU61         | OTU121       | 0.8061 | positive | 0.81 |
| OTU39         | OTU49        | 0.8062 | positive | 0.81 |
| OTU295        | OTU135       | 0.8065 | positive | 0.81 |
| OTU239        | OTU139       | 0.8075 | positive | 0.81 |
| OTU76         | OTU88        | 0.8076 | positive | 0.81 |
| OTU37         | OTU90        | 0.8078 | positive | 0.81 |
| OTU15         | OTU153       | 0.8080 | positive | 0.81 |
| OTU12         | OTU459       | 0.8086 | positive | 0.81 |
| OTU40         | OTU649       | 0.8087 | positive | 0.81 |
| Choline       | OTU135       | 0.8087 | positive | 0.81 |
| OTU23         | OTU90        | 0.8090 | positive | 0.81 |
| OTU106        | OTU394       | 0.8091 | positive | 0.81 |
| OTU81         | OTU451       | 0.8092 | positive | 0.81 |
| OTU4          | OTU43        | 0.8105 | positive | 0.81 |
| OTU563        | OTU469       | 0.8106 | positive | 0.81 |
| OTU17         | OTU143       | 0.8107 | positive | 0.81 |
| OTU43         | OTU295       | 0.8109 | positive | 0.81 |
| OTU49         | OTU60        | 0.8122 | positive | 0.81 |
| OTU135        | OTU143       | 0.8123 | positive | 0.81 |
| OTU46         | OTU60        | 0.8124 | positive | 0.81 |
| OTU58         | OTU97        | 0.8128 | positive | 0.81 |
| OTU51         | OTU223       | 0.8132 | positive | 0.81 |
| Phenylacetate | Butyrate     | 0.8138 | positive | 0.81 |
| OTU18         | OTU488       | 0.8145 | positive | 0.81 |
| OTU11         | OTU41        | 0.8147 | positive | 0.81 |
| OTU295        | OTU213       | 0.8148 | positive | 0.81 |
| OTU27         | OTU235       | 0.8149 | positive | 0.81 |
| L. johnsonii  | OTU306       | 0.8150 | positive | 0.82 |
| OTU58         | OTU129       | 0.8156 | positive | 0.82 |
| OTU74         | OTU160       | 0.8165 | positive | 0.82 |
| OTU18         | OTU172       | 0.8176 | positive | 0.82 |
| OTU176        | OTU157       | 0.8179 | positive | 0.82 |
| OTU87         | OTU211       | 0.8187 | positive | 0.82 |
| OTU68         | OTU487       | 0.8191 | positive | 0.82 |
| OTU18         | OTU121       | 0.8197 | positive | 0.82 |
| Isoleucine    | Betaxylose   | 0.8198 | positive | 0.82 |
| OTU58         | OTU104       | 0.8204 | positive | 0.82 |
| OTU73         | OTU476       | 0.8211 | positive | 0.82 |
| OTU21         | OTU45        | 0.8217 | positive | 0.82 |
| OTU61         | OTU172       | 0.8227 | positive | 0.82 |
| Serum UA      | L. johnsonii | 0.8630 | positive | 0.86 |
| OTU71         | OTU259       | 0.8234 | positive | 0.82 |
| Betagalactose | OTU180       | 0.8246 | positive | 0.82 |
| OTU76         | OTU356       | 0.8246 | positive | 0.82 |
| OTU8          | OTU142       | 0.8256 | positive | 0.83 |
| OTU35         | OTU143       | 0.8263 | positive | 0.83 |
| OTU1          | OTU170       | 0.8264 | positive | 0.83 |

|               |               |        |          |      |
|---------------|---------------|--------|----------|------|
| OTU213        | OTU91         | 0.8267 | positive | 0.83 |
| OTU81         | OTU517        | 0.8271 | positive | 0.83 |
| OTU70         | OTU223        | 0.8285 | positive | 0.83 |
| OTU76         | OTU105        | 0.8286 | positive | 0.83 |
| OTU71         | OTU94         | 0.8288 | positive | 0.83 |
| OTU104        | OTU129        | 0.8293 | positive | 0.83 |
| OTU44         | OTU110        | 0.8299 | positive | 0.83 |
| OTU157        | OTU124        | 0.8310 | positive | 0.83 |
| Betagalactose | OTU191        | 0.8314 | positive | 0.83 |
| OTU488        | OTU190        | 0.8323 | positive | 0.83 |
| OTU139        | OTU451        | 0.8323 | positive | 0.83 |
| OTU150        | OTU137        | 0.8326 | positive | 0.83 |
| OTU23         | OTU71         | 0.8333 | positive | 0.83 |
| OTU34         | OTU104        | 0.8336 | positive | 0.83 |
| OTU18         | OTU211        | 0.8336 | positive | 0.83 |
| OTU104        | OTU128        | 0.8337 | positive | 0.83 |
| OTU95         | OTU160        | 0.8347 | positive | 0.83 |
| Tryptophan    | OTU50         | 0.8347 | positive | 0.83 |
| OTU93         | OTU172        | 0.8348 | positive | 0.83 |
| OTU394        | OTU99         | 0.8350 | positive | 0.83 |
| Betaglucose   | Betagalactose | 0.8354 | positive | 0.84 |
| OTU487        | OTU164        | 0.8360 | positive | 0.84 |
| OTU155        | OTU199        | 0.8366 | positive | 0.84 |
| OTU10         | OTU356        | 0.8376 | positive | 0.84 |
| OTU563        | OTU180        | 0.8385 | positive | 0.84 |
| OTU58         | OTU101        | 0.8386 | positive | 0.84 |
| OTU24         | OTU139        | 0.8387 | positive | 0.84 |
| OTU82         | OTU90         | 0.8392 | positive | 0.84 |
| OTU97         | OTU128        | 0.8399 | positive | 0.84 |
| OTU76         | OTU49         | 0.8401 | positive | 0.84 |
| OTU19         | OTU180        | 0.8403 | positive | 0.84 |
| OTU53         | OTU155        | 0.8421 | positive | 0.84 |
| OTU83         | OTU563        | 0.8424 | positive | 0.84 |
| OTU488        | OTU211        | 0.8426 | positive | 0.84 |
| OTU397        | OTU104        | 0.8428 | positive | 0.84 |
| Phenylacetate | Glycine       | 0.8431 | positive | 0.84 |
| Butyrate      | Nicotinate    | 0.8434 | positive | 0.84 |
| OTU37         | OTU259        | 0.8445 | positive | 0.84 |
| OTU378        | OTU110        | 0.8449 | positive | 0.84 |
| OTU397        | OTU58         | 0.8450 | positive | 0.85 |
| OTU1          | OTU75         | 0.8452 | positive | 0.85 |
| OTU121        | OTU190        | 0.8456 | positive | 0.85 |
| OTU150        | OTU113        | 0.8464 | positive | 0.85 |
| OTU20         | OTU131        | 0.8466 | positive | 0.85 |
| OTU29         | OTU56         | 0.8470 | positive | 0.85 |
| OTU19         | OTU48         | 0.8474 | positive | 0.85 |
| OTU91         | OTU137        | 0.8478 | positive | 0.85 |
| OTU61         | OTU211        | 0.8482 | positive | 0.85 |
| OTU37         | OTU82         | 0.8488 | positive | 0.85 |
| OTU394        | OTU135        | 0.8491 | positive | 0.85 |

|               |                 |        |          |      |
|---------------|-----------------|--------|----------|------|
| OTU23         | OTU82           | 0.8492 | positive | 0.85 |
| OTU23         | OTU259          | 0.8493 | positive | 0.85 |
| OTU39         | OTU88           | 0.8494 | positive | 0.85 |
| OTU190        | OTU172          | 0.8500 | positive | 0.85 |
| OTU10         | OTU103          | 0.8503 | positive | 0.85 |
| OTU397        | OTU128          | 0.8526 | positive | 0.85 |
| OTU17         | OTU112          | 0.8536 | positive | 0.85 |
| OTU221        | OTU56           | 0.8539 | positive | 0.85 |
| OTU58         | OTU65           | 0.8539 | positive | 0.85 |
| OTU211        | OTU172          | 0.8545 | positive | 0.85 |
| OTU84         | OTU155          | 0.8549 | positive | 0.85 |
| OTU104        | OTU97           | 0.8559 | positive | 0.86 |
| Betaxylose    | Lactate         | 0.8562 | positive | 0.86 |
| OTU71         | OTU82           | 0.8562 | positive | 0.86 |
| OTU84         | OTU424          | 0.8570 | positive | 0.86 |
| OTU128        | OTU137          | 0.8571 | positive | 0.86 |
| OTU43         | OTU461          | 0.8571 | positive | 0.86 |
| OTU104        | OTU101          | 0.8575 | positive | 0.86 |
| Glycine       | Propionate      | 0.8576 | positive | 0.86 |
| OTU21         | OTU150          | 0.8581 | positive | 0.86 |
| OTU129        | OTU150          | 0.8581 | positive | 0.86 |
| OTU38         | OTU336          | 0.8588 | positive | 0.86 |
| OTU96         | OTU139          | 0.8592 | positive | 0.86 |
| OTU100        | OTU69           | 0.8592 | positive | 0.86 |
| OTU121        | OTU211          | 0.8597 | positive | 0.86 |
| L. johnsonii  | Lachnospiraceae | 0.8609 | positive | 0.86 |
| OTU34         | OTU128          | 0.8609 | positive | 0.86 |
| OTU61         | OTU488          | 0.8615 | positive | 0.86 |
| OTU129        | OTU128          | 0.8618 | positive | 0.86 |
| OTU37         | OTU71           | 0.8624 | positive | 0.86 |
| OTU103        | OTU49           | 0.8630 | positive | 0.86 |
| OTU8          | OTU76           | 0.8633 | positive | 0.86 |
| OTU97         | OTU150          | 0.8637 | positive | 0.86 |
| Glycine       | Isoleucine      | 0.8648 | positive | 0.86 |
| OTU517        | OTU139          | 0.8655 | positive | 0.87 |
| Betaglucose   | OTU191          | 0.8666 | positive | 0.87 |
| OTU135        | OTU134          | 0.8675 | positive | 0.87 |
| OTU111        | OTU588          | 0.8683 | positive | 0.87 |
| OTU87         | OTU146          | 0.8693 | positive | 0.87 |
| OTU239        | OTU119          | 0.8694 | positive | 0.87 |
| OTU34         | OTU150          | 0.8698 | positive | 0.87 |
| OTU119        | OTU158          | 0.8702 | positive | 0.87 |
| OTU336        | OTU109          | 0.8704 | positive | 0.87 |
| OTU62         | OTU119          | 0.8709 | positive | 0.87 |
| Urocanate     | Hypoxanthine    | 0.8720 | positive | 0.87 |
| Phenylacetate | Isoleucine      | 0.8721 | positive | 0.87 |
| OTU87         | OTU488          | 0.8722 | positive | 0.87 |
| OTU19         | OTU475          | 0.8735 | positive | 0.87 |
| OTU128        | OTU113          | 0.8747 | positive | 0.87 |
| OTU15         | OTU40           | 0.8754 | positive | 0.88 |



|               |            |        |          |      |
|---------------|------------|--------|----------|------|
| Phenylacetate | Betaxylose | 0.8767 | positive | 0.88 |
| OTU200        | OTU481     | 0.8770 | positive | 0.88 |
| OTU410        | OTU158     | 0.8772 | positive | 0.88 |
| OTU70         | OTU424     | 0.8773 | positive | 0.88 |
| OTU35         | OTU134     | 0.8775 | positive | 0.88 |
| OTU119        | OTU451     | 0.8790 | positive | 0.88 |
| OTU25         | OTU87      | 0.8793 | positive | 0.88 |
| OTU25         | OTU121     | 0.8794 | positive | 0.88 |
| OTU190        | OTU211     | 0.8804 | positive | 0.88 |
| OTU17         | OTU135     | 0.8810 | positive | 0.88 |
| OTU49         | OTU105     | 0.8815 | positive | 0.88 |
| OTU70         | OTU53      | 0.8818 | positive | 0.88 |
| OTU19         | OTU469     | 0.8832 | positive | 0.88 |
| OTU93         | OTU87      | 0.8834 | positive | 0.88 |
| OTU65         | OTU150     | 0.8841 | positive | 0.88 |
| OTU93         | OTU146     | 0.8844 | positive | 0.88 |
| OTU487        | OTU459     | 0.8846 | positive | 0.88 |
| OTU306        | OTU75      | 0.8853 | positive | 0.89 |
| Isoleucine    | Lactate    | 0.8858 | positive | 0.89 |
| OTU56         | OTU476     | 0.8862 | positive | 0.89 |
| OTU29         | OTU73      | 0.8864 | positive | 0.89 |
| OTU123        | OTU82      | 0.8874 | positive | 0.89 |
| OTU397        | OTU150     | 0.8881 | positive | 0.89 |
| OTU101        | OTU128     | 0.8888 | positive | 0.89 |
| OTU56         | OTU60      | 0.8891 | positive | 0.89 |
| OTU155        | OTU424     | 0.8891 | positive | 0.89 |
| OTU119        | OTU164     | 0.8897 | positive | 0.89 |
| OTU76         | OTU103     | 0.8897 | positive | 0.89 |
| OTU38         | OTU28      | 0.8898 | positive | 0.89 |
| OTU149        | OTU459     | 0.8901 | positive | 0.89 |
| OTU71         | OTU90      | 0.8902 | positive | 0.89 |
| OTU104        | OTU616     | 0.8904 | positive | 0.89 |
| OTU11         | OTU48      | 0.8904 | positive | 0.89 |
| OTU34         | OTU58      | 0.8907 | positive | 0.89 |
| OTU150        | OTU616     | 0.8907 | positive | 0.89 |
| OTU39         | OTU103     | 0.8912 | positive | 0.89 |
| OTU137        | OTU113     | 0.8914 | positive | 0.89 |
| OTU25         | OTU146     | 0.8921 | positive | 0.89 |
| OTU24         | OTU119     | 0.8921 | positive | 0.89 |
| OTU11         | OTU83      | 0.8935 | positive | 0.89 |
| OTU56         | OTU115     | 0.8935 | positive | 0.89 |
| OTU65         | OTU128     | 0.8940 | positive | 0.89 |
| Propionate    | Lactate    | 0.8956 | positive | 0.90 |
| OTU15         | OTU424     | 0.8960 | positive | 0.90 |
| OTU37         | OTU94      | 0.8963 | positive | 0.90 |
| OTU104        | OTU113     | 0.8977 | positive | 0.90 |
| OTU65         | OTU104     | 0.8981 | positive | 0.90 |
| OTU101        | OTU150     | 0.8984 | positive | 0.90 |
| OTU93         | OTU211     | 0.8986 | positive | 0.90 |
| OTU118        | OTU52      | 0.9001 | positive | 0.90 |

|               |            |        |          |      |
|---------------|------------|--------|----------|------|
| OTU19         | OTU83      | 0.9001 | positive | 0.90 |
| OTU29         | OTU60      | 0.9018 | positive | 0.90 |
| OTU8          | OTU105     | 0.9020 | positive | 0.90 |
| OTU451        | OTU158     | 0.9043 | positive | 0.90 |
| OTU62         | OTU164     | 0.9043 | positive | 0.90 |
| OTU119        | OTU139     | 0.9045 | positive | 0.90 |
| OTU123        | OTU94      | 0.9046 | positive | 0.90 |
| OTU48         | OTU180     | 0.9054 | positive | 0.91 |
| OTU616        | OTU128     | 0.9066 | positive | 0.91 |
| OTU616        | OTU137     | 0.9069 | positive | 0.91 |
| OTU200        | OTU184     | 0.9080 | positive | 0.91 |
| OTU84         | OTU199     | 0.9095 | positive | 0.91 |
| OTU17         | OTU134     | 0.9102 | positive | 0.91 |
| OTU65         | OTU137     | 0.9102 | positive | 0.91 |
| OTU110        | OTU80      | 0.9111 | positive | 0.91 |
| OTU10         | OTU88      | 0.9125 | positive | 0.91 |
| OTU61         | OTU146     | 0.9127 | positive | 0.91 |
| Phenylacetate | Lactate    | 0.9139 | positive | 0.91 |
| OTU134        | OTU99      | 0.9139 | positive | 0.91 |
| OTU34         | OTU137     | 0.9142 | positive | 0.91 |
| OTU53         | OTU424     | 0.9145 | positive | 0.91 |
| OTU58         | OTU616     | 0.9148 | positive | 0.91 |
| OTU102        | OTU310     | 0.9150 | positive | 0.91 |
| OTU35         | OTU394     | 0.9161 | positive | 0.92 |
| OTU517        | OTU158     | 0.9170 | positive | 0.92 |
| OTU97         | OTU137     | 0.9173 | positive | 0.92 |
| OTU35         | OTU135     | 0.9180 | positive | 0.92 |
| OTU11         | OTU180     | 0.9183 | positive | 0.92 |
| OTU461        | OTU160     | 0.9193 | positive | 0.92 |
| OTU38         | OTU109     | 0.9217 | positive | 0.92 |
| OTU221        | OTU29      | 0.9233 | positive | 0.92 |
| Phenylacetate | Propionate | 0.9247 | positive | 0.92 |
| OTU17         | OTU99      | 0.9257 | positive | 0.93 |
| OTU99         | OTU143     | 0.9258 | positive | 0.93 |
| OTU39         | OTU356     | 0.9270 | positive | 0.93 |
| OTU119        | OTU517     | 0.9274 | positive | 0.93 |
| OTU397        | OTU137     | 0.9282 | positive | 0.93 |
| OTU19         | OTU563     | 0.9284 | positive | 0.93 |
| OTU221        | OTU60      | 0.9292 | positive | 0.93 |
| OTU146        | OTU190     | 0.9294 | positive | 0.93 |
| OTU24         | OTU164     | 0.9317 | positive | 0.93 |
| OTU184        | OTU481     | 0.9321 | positive | 0.93 |
| OTU101        | OTU137     | 0.9326 | positive | 0.93 |
| OTU93         | OTU61      | 0.9347 | positive | 0.93 |
| OTU28         | OTU109     | 0.9349 | positive | 0.93 |
| OTU25         | OTU61      | 0.9353 | positive | 0.94 |
| OTU11         | OTU475     | 0.9358 | positive | 0.94 |
| OTU58         | OTU113     | 0.9363 | positive | 0.94 |
| OTU87         | OTU190     | 0.9371 | positive | 0.94 |
| OTU60         | OTU115     | 0.9386 | positive | 0.94 |

|            |            |        |          |      |
|------------|------------|--------|----------|------|
| OTU18      | OTU146     | 0.9388 | positive | 0.94 |
| Isoleucine | Propionate | 0.9408 | positive | 0.94 |
| OTU18      | OTU87      | 0.9415 | positive | 0.94 |
| OTU131     | OTU488     | 0.9439 | positive | 0.94 |
| OTU93      | OTU18      | 0.9449 | positive | 0.94 |
| OTU239     | OTU158     | 0.9453 | positive | 0.95 |
| OTU11      | OTU469     | 0.9453 | positive | 0.95 |
| OTU29      | OTU115     | 0.9458 | positive | 0.95 |
| OTU25      | OTU190     | 0.9464 | positive | 0.95 |
| OTU17      | OTU35      | 0.9467 | positive | 0.95 |
| OTU35      | OTU99      | 0.9469 | positive | 0.95 |
| OTU48      | OTU475     | 0.9480 | positive | 0.95 |
| OTU93      | OTU121     | 0.9484 | positive | 0.95 |
| OTU61      | OTU87      | 0.9491 | positive | 0.95 |
| OTU8       | OTU49      | 0.9497 | positive | 0.95 |
| OTU39      | OTU10      | 0.9506 | positive | 0.95 |
| OTU25      | OTU93      | 0.9510 | positive | 0.95 |
| OTU97      | OTU113     | 0.9513 | positive | 0.95 |
| OTU39      | OTU76      | 0.9519 | positive | 0.95 |
| OTU82      | OTU94      | 0.9537 | positive | 0.95 |
| OTU123     | OTU259     | 0.9541 | positive | 0.95 |
| OTU25      | OTU18      | 0.9547 | positive | 0.95 |
| OTU97      | OTU616     | 0.9555 | positive | 0.96 |
| OTU10      | OTU76      | 0.9560 | positive | 0.96 |
| OTU129     | OTU113     | 0.9561 | positive | 0.96 |
| OTU135     | OTU99      | 0.9572 | positive | 0.96 |
| OTU48      | OTU469     | 0.9573 | positive | 0.96 |
| OTU93      | OTU190     | 0.9592 | positive | 0.96 |
| OTU83      | OTU180     | 0.9612 | positive | 0.96 |
| OTU129     | OTU616     | 0.9613 | positive | 0.96 |
| OTU164     | OTU139     | 0.9621 | positive | 0.96 |
| OTU129     | OTU137     | 0.9669 | positive | 0.97 |
| OTU476     | OTU60      | 0.9673 | positive | 0.97 |
| OTU29      | OTU476     | 0.9674 | positive | 0.97 |
| OTU469     | OTU180     | 0.9676 | positive | 0.97 |
| OTU65      | OTU97      | 0.9684 | positive | 0.97 |
| OTU65      | OTU129     | 0.9688 | positive | 0.97 |
| OTU221     | OTU476     | 0.9688 | positive | 0.97 |
| OTU101     | OTU113     | 0.9697 | positive | 0.97 |
| OTU34      | OTU97      | 0.9706 | positive | 0.97 |
| OTU221     | OTU115     | 0.9711 | positive | 0.97 |
| OTU397     | OTU113     | 0.9726 | positive | 0.97 |
| OTU94      | OTU259     | 0.9727 | positive | 0.97 |
| OTU48      | OTU83      | 0.9745 | positive | 0.97 |
| OTU239     | OTU517     | 0.9755 | positive | 0.98 |
| OTU34      | OTU65      | 0.9755 | positive | 0.98 |
| OTU475     | OTU180     | 0.9765 | positive | 0.98 |
| OTU34      | OTU129     | 0.9768 | positive | 0.98 |
| OTU83      | OTU475     | 0.9785 | positive | 0.98 |
| OTU397     | OTU616     | 0.9786 | positive | 0.98 |

|        |        |        |          |      |
|--------|--------|--------|----------|------|
| OTU83  | OTU469 | 0.9787 | positive | 0.98 |
| OTU65  | OTU113 | 0.9789 | positive | 0.98 |
| OTU82  | OTU259 | 0.9811 | positive | 0.98 |
| OTU65  | OTU616 | 0.9815 | positive | 0.98 |
| OTU101 | OTU97  | 0.9815 | positive | 0.98 |
| OTU34  | OTU113 | 0.9819 | positive | 0.98 |
| OTU101 | OTU616 | 0.9821 | positive | 0.98 |
| OTU397 | OTU97  | 0.9827 | positive | 0.98 |
| OTU476 | OTU115 | 0.9836 | positive | 0.98 |
| OTU129 | OTU101 | 0.9848 | positive | 0.98 |
| OTU129 | OTU97  | 0.9849 | positive | 0.98 |
| OTU397 | OTU129 | 0.9858 | positive | 0.99 |
| OTU397 | OTU65  | 0.9864 | positive | 0.99 |
| OTU34  | OTU616 | 0.9864 | positive | 0.99 |
| OTU517 | OTU451 | 0.9882 | positive | 0.99 |
| OTU34  | OTU101 | 0.9888 | positive | 0.99 |
| OTU239 | OTU451 | 0.9897 | positive | 0.99 |
| OTU65  | OTU101 | 0.9900 | positive | 0.99 |
| OTU616 | OTU113 | 0.9914 | positive | 0.99 |
| OTU397 | OTU34  | 0.9926 | positive | 0.99 |
| OTU61  | OTU190 | 0.9927 | positive | 0.99 |
| OTU18  | OTU61  | 0.9937 | positive | 0.99 |
| OTU24  | OTU62  | 0.9939 | positive | 0.99 |
| OTU18  | OTU190 | 0.9946 | positive | 0.99 |
| OTU397 | OTU101 | 0.9957 | positive | 1.00 |
| OTU475 | OTU469 | 0.9967 | positive | 1.00 |

---
